# Supplementary material
Source: MDPI journal article supplement (https://www.mdpi.com/2304-6740/6/4/123)

# Supplementary Materials: Gold(III) pyridine-benzimidazole complexes as aquaglyceroporin inhibitors and antiproliferative agents

Brech Aikman, Margot N. Wenzel, Andreia F. Mósca, Andreia de Almeida, Wim T. Klooster, Simon J. Coles, Graça Soveral and Angela Casini

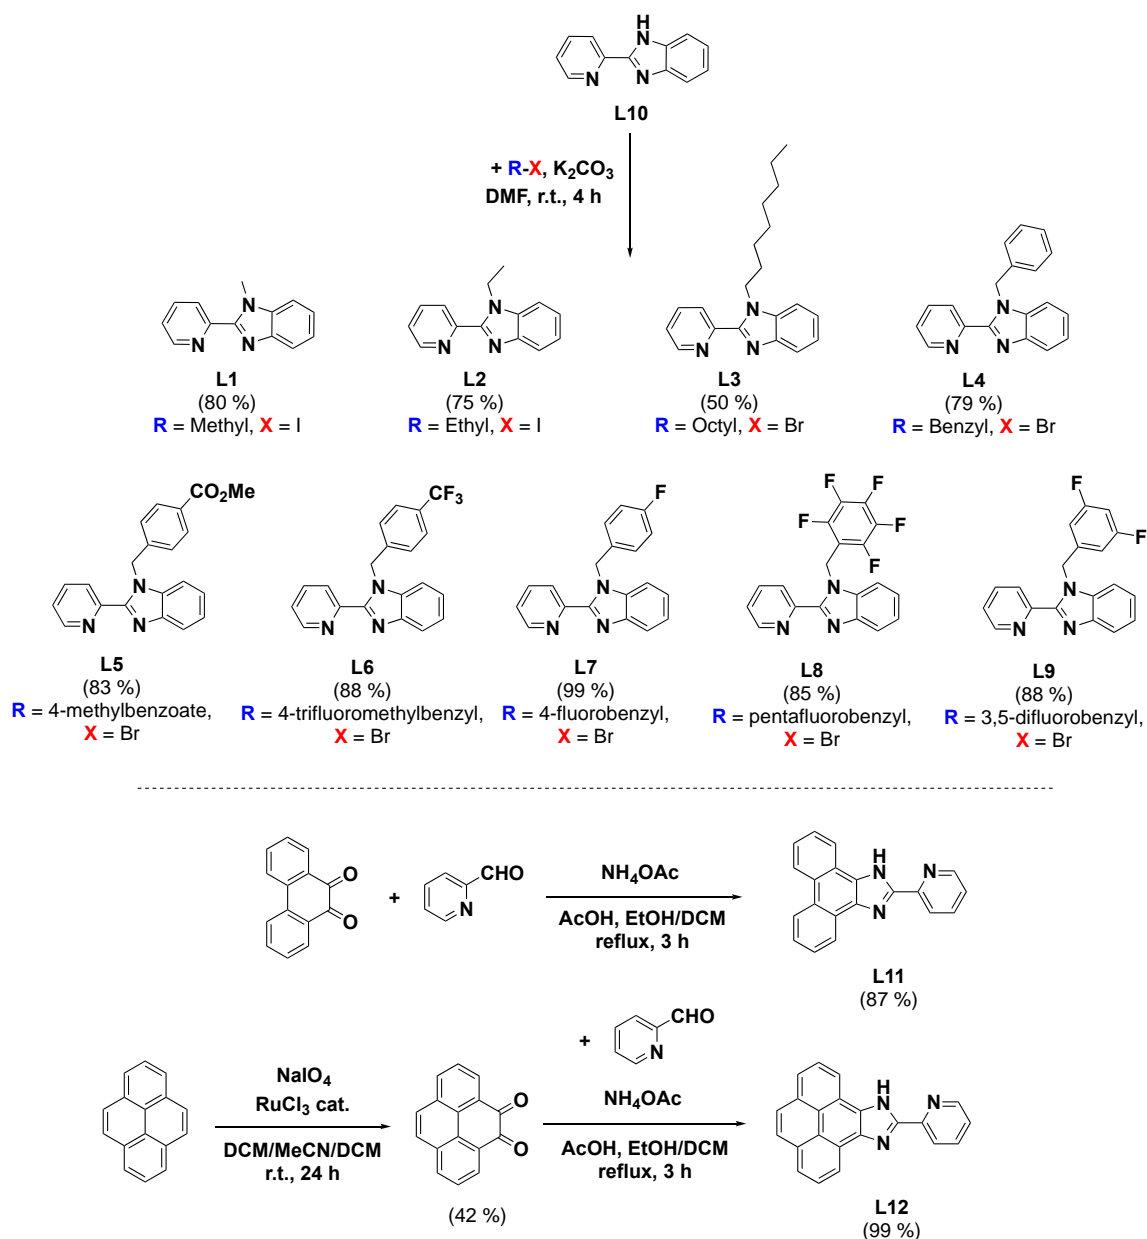

**Scheme S1.** Synthetic pathways to ligands **L1-L12**.

## S1. NMR spectra

### Ligand L5

- $^1\text{H}$  NMR:

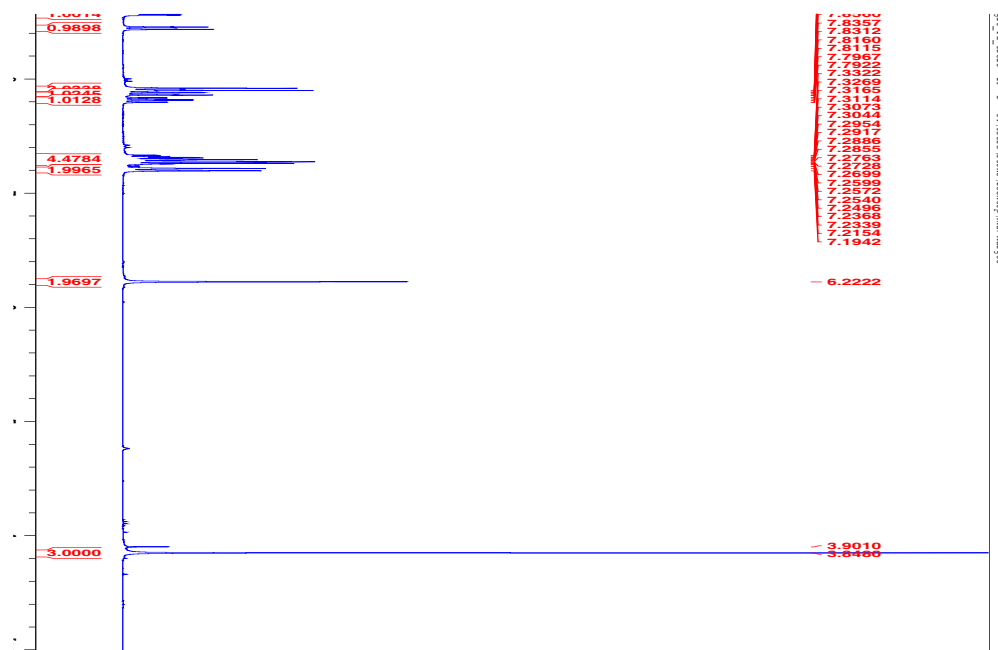

Figure S1.  $^1\text{H}$  NMR (400.13 MHz,  $\text{CDCl}_3$ ) spectrum of ligand L5.

- $^{13}\text{C}\{^1\text{H}\}$  NMR:

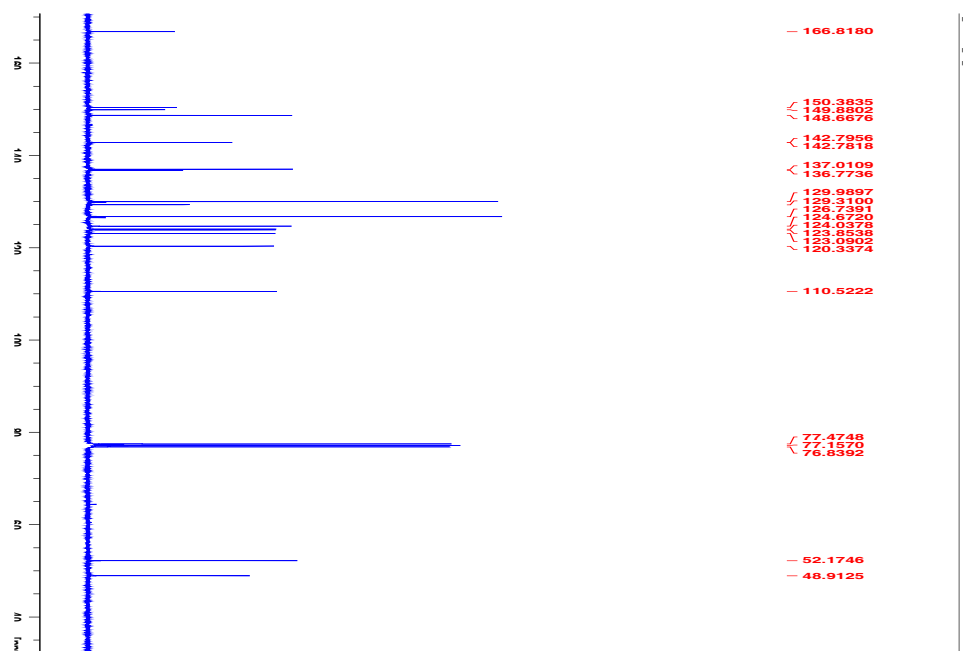

Figure S2.  $^{13}\text{C}\{^1\text{H}\}$  NMR (100.61 MHz,  $\text{CDCl}_3$ ) spectrum of ligand L5.

- $^1\text{H}$  NMR:

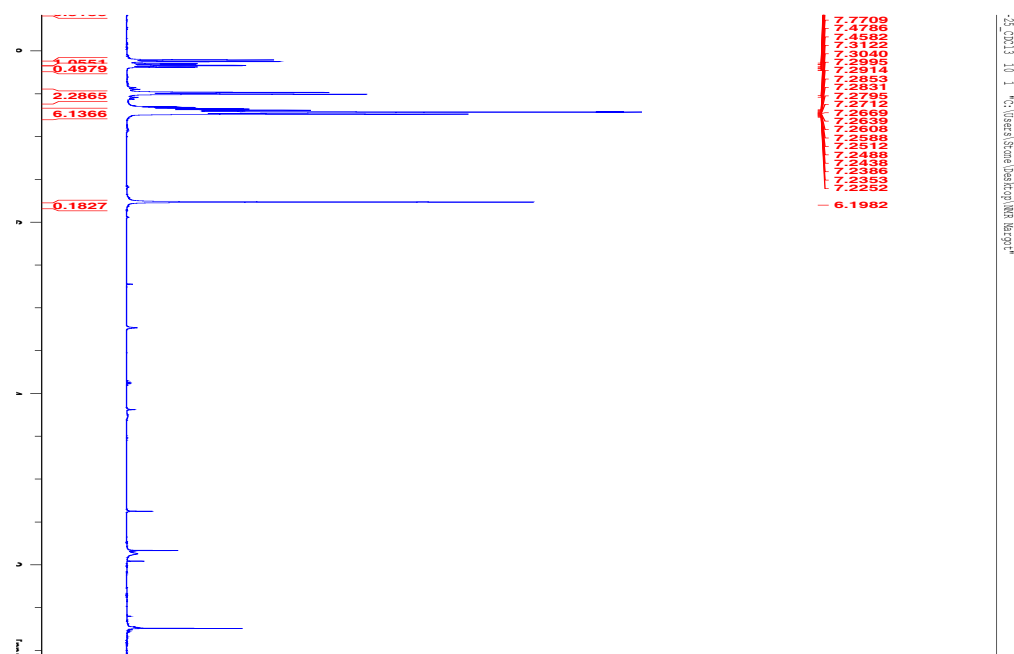

Figure S3.  $^1\text{H}$  NMR (400.14 MHz,  $\text{CDCl}_3$ ) spectrum of ligand **L6**.

- $^{13}\text{C}\{^1\text{H}\}$  NMR:

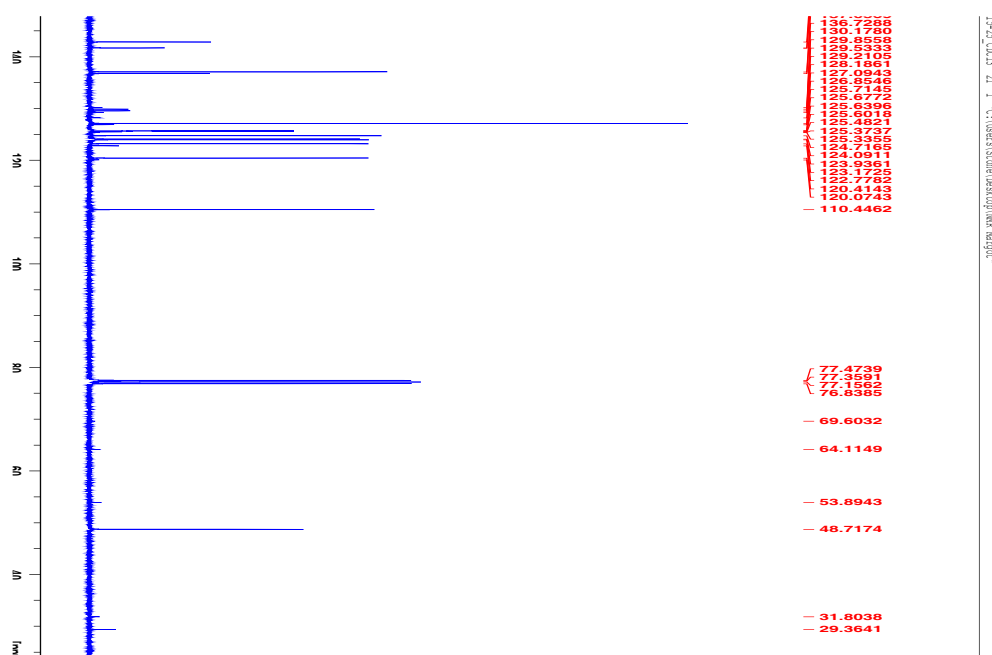

Figure S4.  $^{13}\text{C}\{^1\text{H}\}$  NMR (100.61 MHz,  $\text{CDCl}_3$ ) spectrum of ligand **L6**.

**Complex C2**

- $^1\text{H}$  NMR:

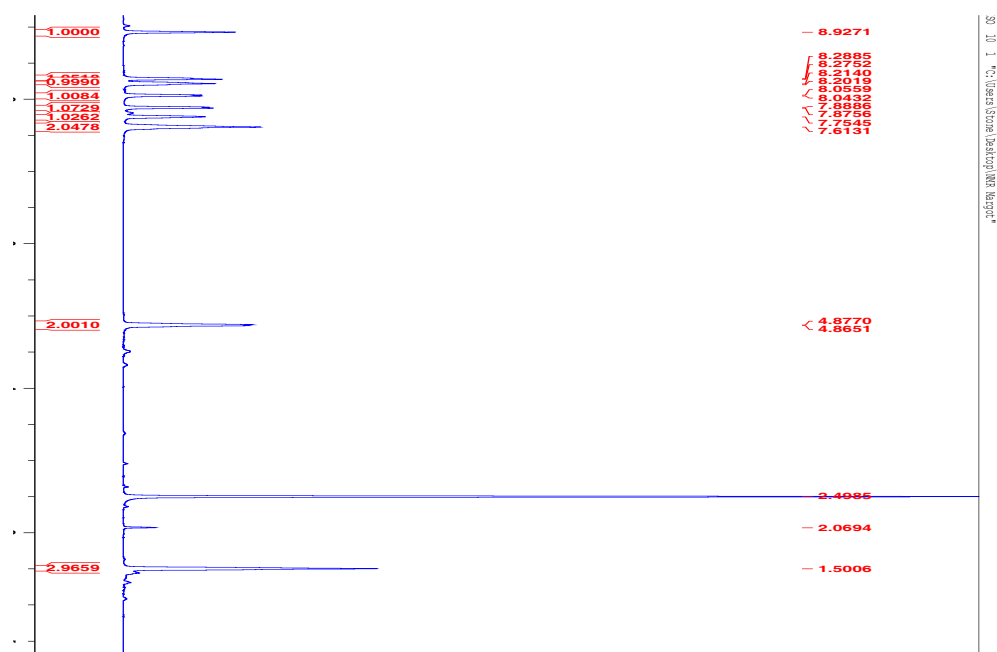Figure S5.  $^1\text{H}$  NMR (500.13 MHz, DMSO- $d_6$ ) spectrum of complex **C2**.

- $^{13}\text{C}\{^1\text{H}\}$  NMR:

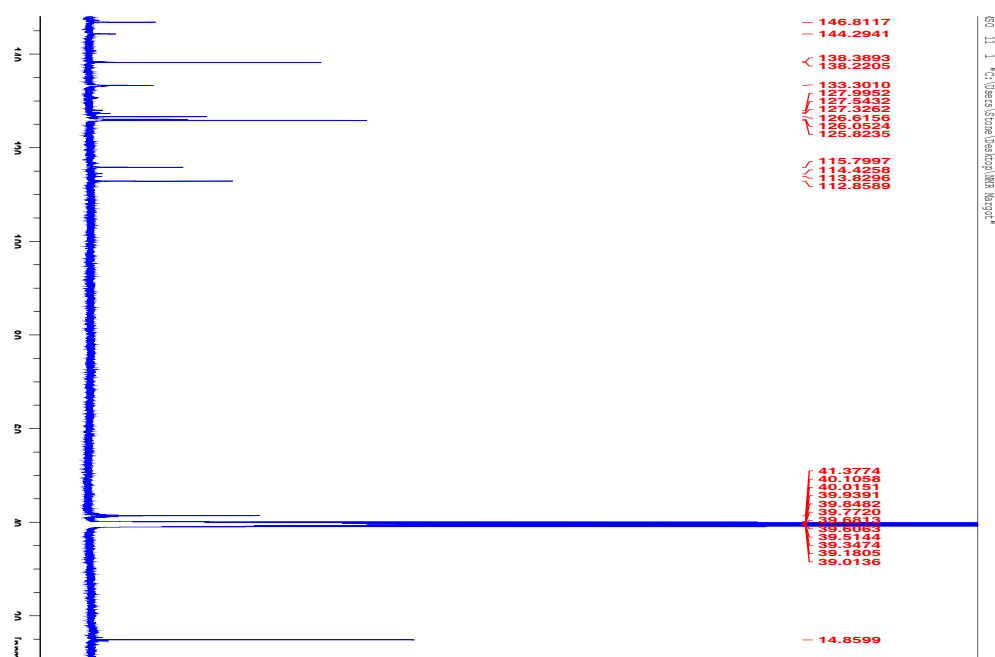Figure S6.  $^{13}\text{C}\{^1\text{H}\}$  NMR (125.77 MHz, DMSO- $d_6$ ) spectrum of complex **C2**.

## Complex C3

- $^1\text{H}$  NMR:

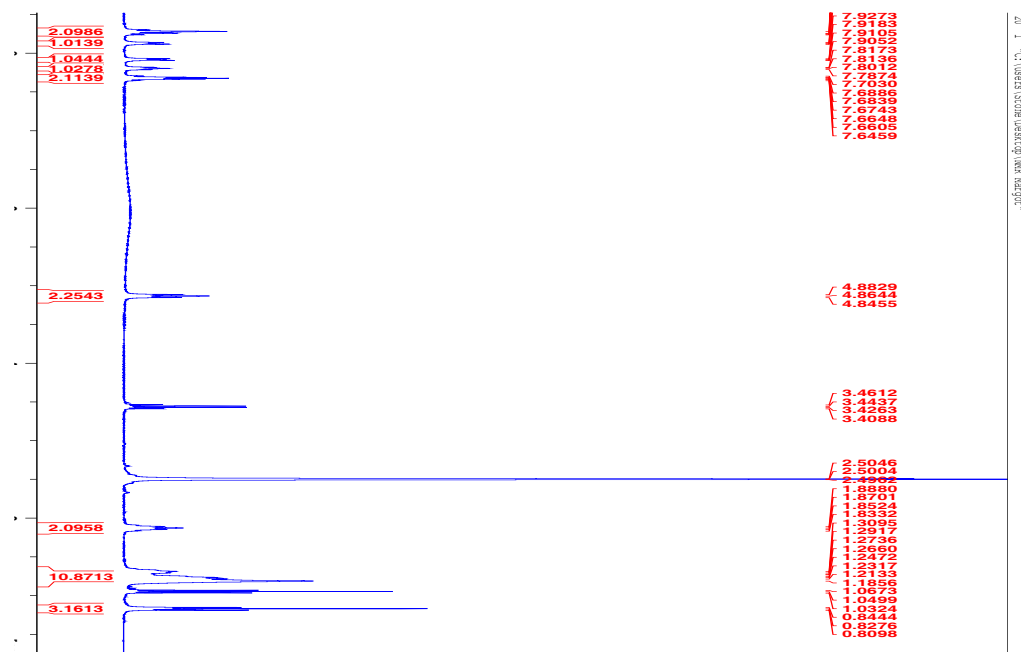Figure S7.  $^1\text{H}$  NMR (400.13 MHz,  $\text{DMSO-d}_6$ ) spectrum of complex **C3**.

- $^{13}\text{C}\{^1\text{H}\}$  NMR:

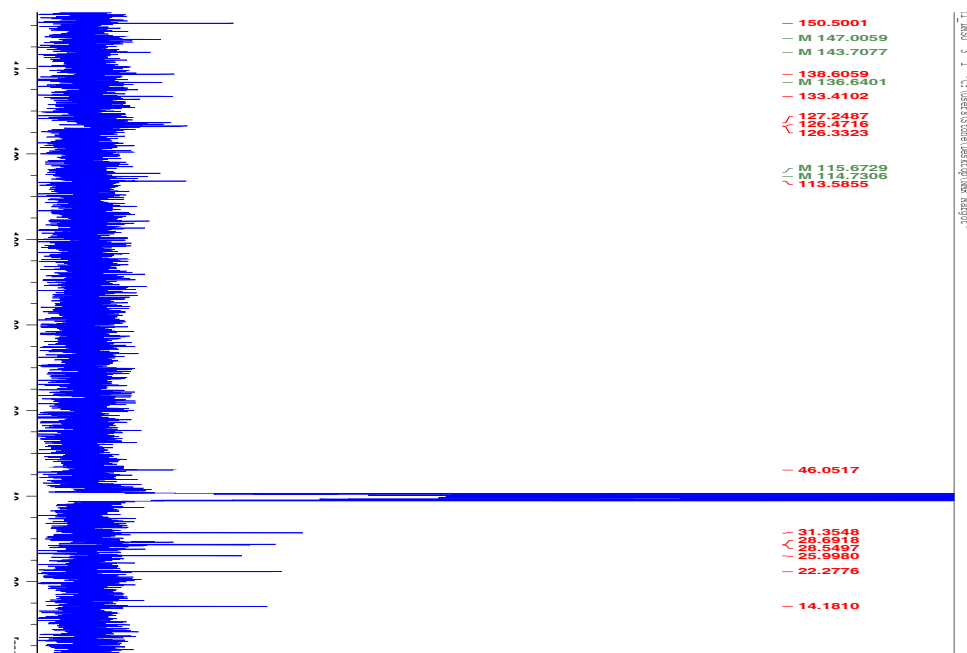Figure S8.  $^{13}\text{C}\{^1\text{H}\}$  NMR (125.77 MHz,  $\text{DMSO-d}_6$ ) spectrum of complex **C3**.

## Complex C4

- $^1\text{H}$  NMR:

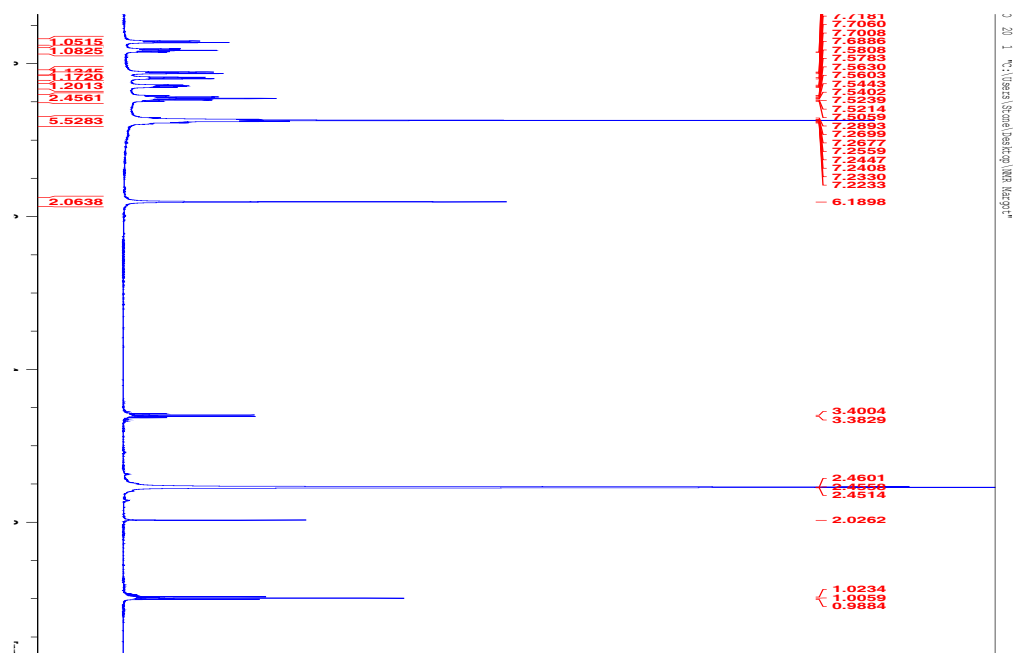Figure S9.  $^1\text{H}$  NMR (400.13 MHz,  $\text{DMSO}-d_6$ ) spectrum of complex **C4**.

- $^{13}\text{C}\{^1\text{H}\}$  NMR:

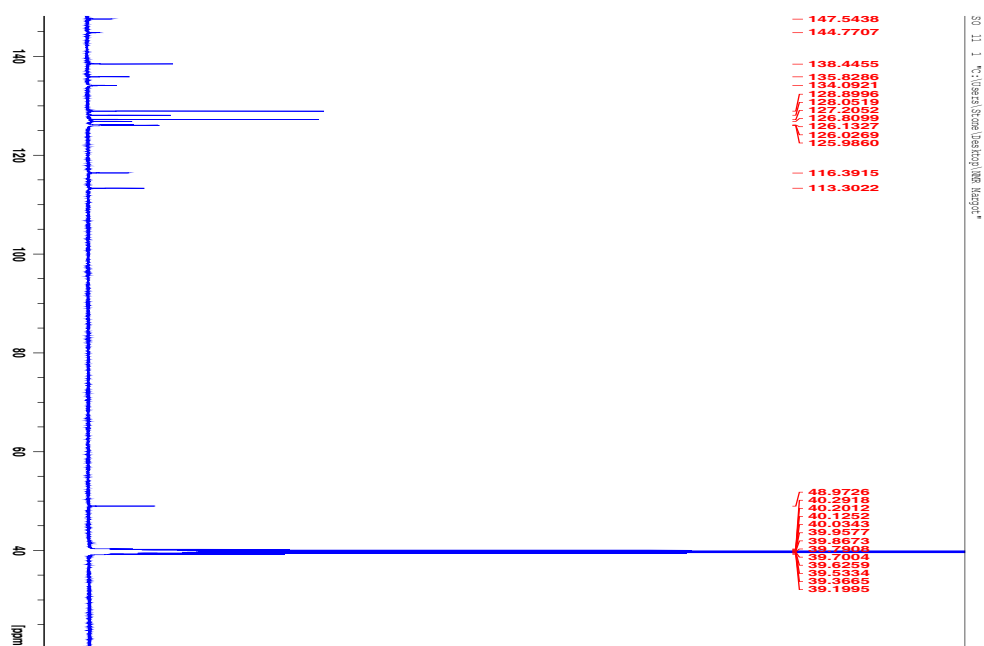Figure S10.  $^{13}\text{C}\{^1\text{H}\}$  NMR (125.77 MHz,  $\text{DMSO}-d_6$ ) spectrum of complex **C4**.

## Complex C5

•  $^1\text{H}$  NMR: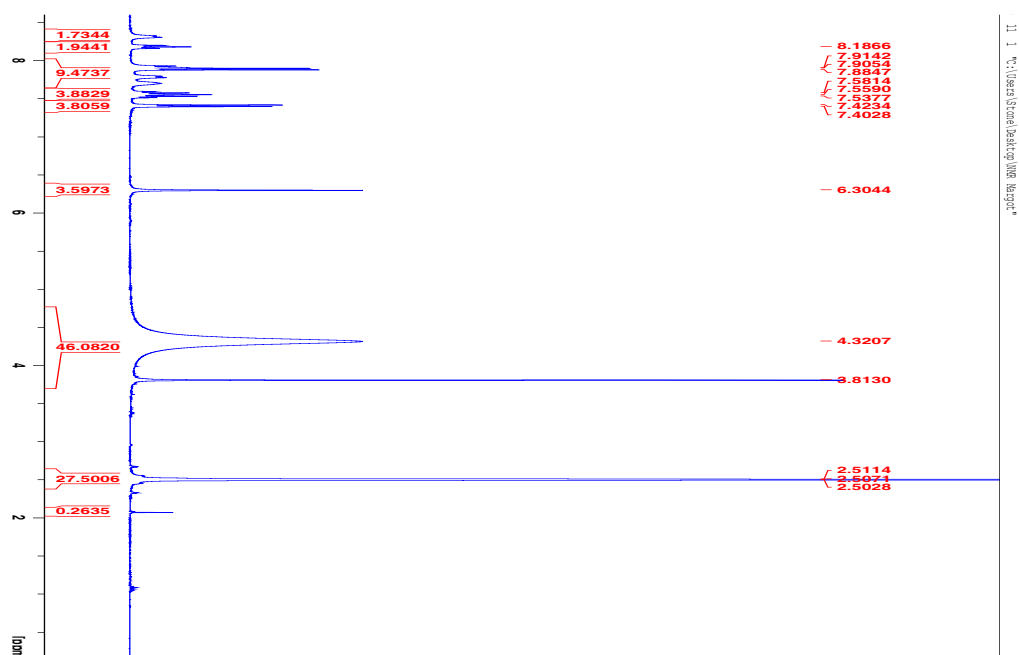Figure S11.  $^1\text{H}$  NMR (400.13 MHz,  $\text{DMSO}-d_6$ ) spectrum of complex **C5**.•  $^{13}\text{C}\{^1\text{H}\}$  NMR: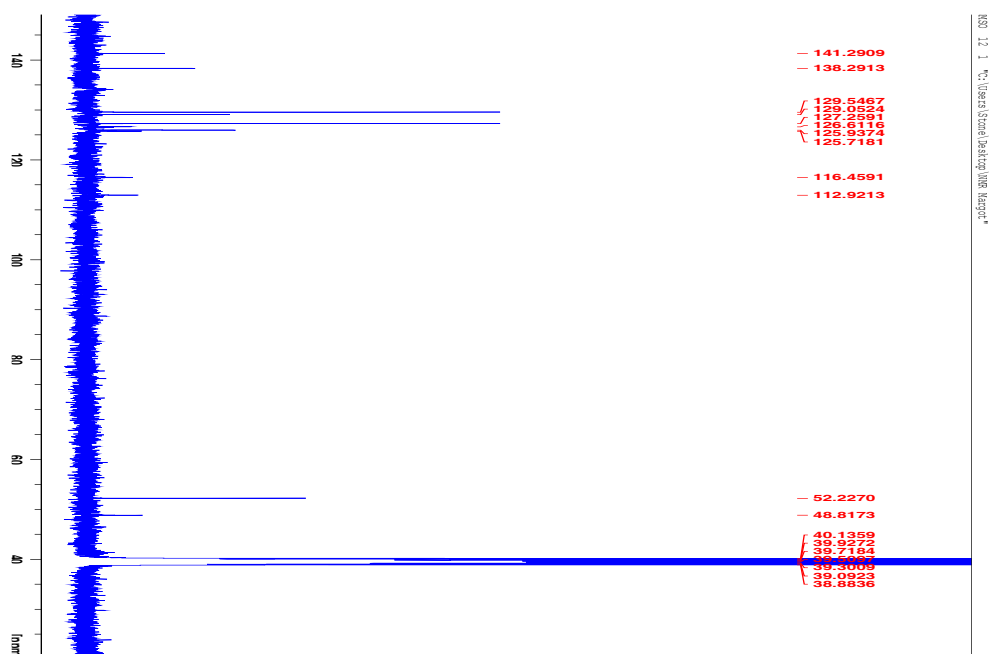Figure S12.  $^{13}\text{C}\{^1\text{H}\}$  NMR (100.61 MHz,  $\text{DMSO}-d_6$ ) spectrum of complex **C5**.

- $^1\text{H}$  NMR:



## Complex C7

- $^1\text{H}$  NMR:

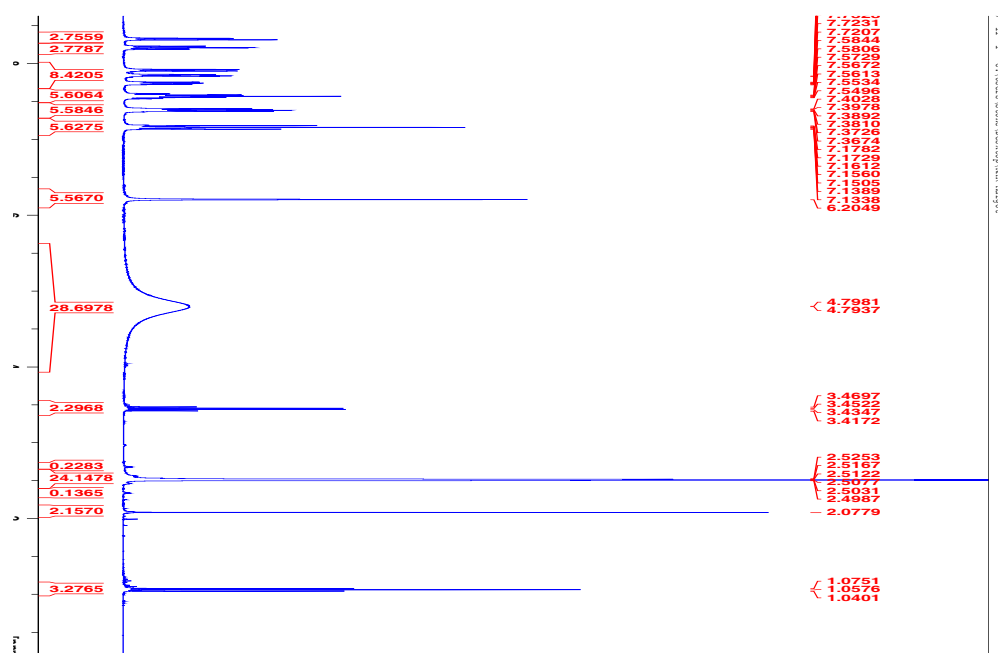Figure S15.  $^1\text{H}$  NMR (400.13 MHz,  $\text{DMSO}-d_6$ ) spectrum of complex **C7**.

- $^{13}\text{C}\{^1\text{H}\}$  NMR:

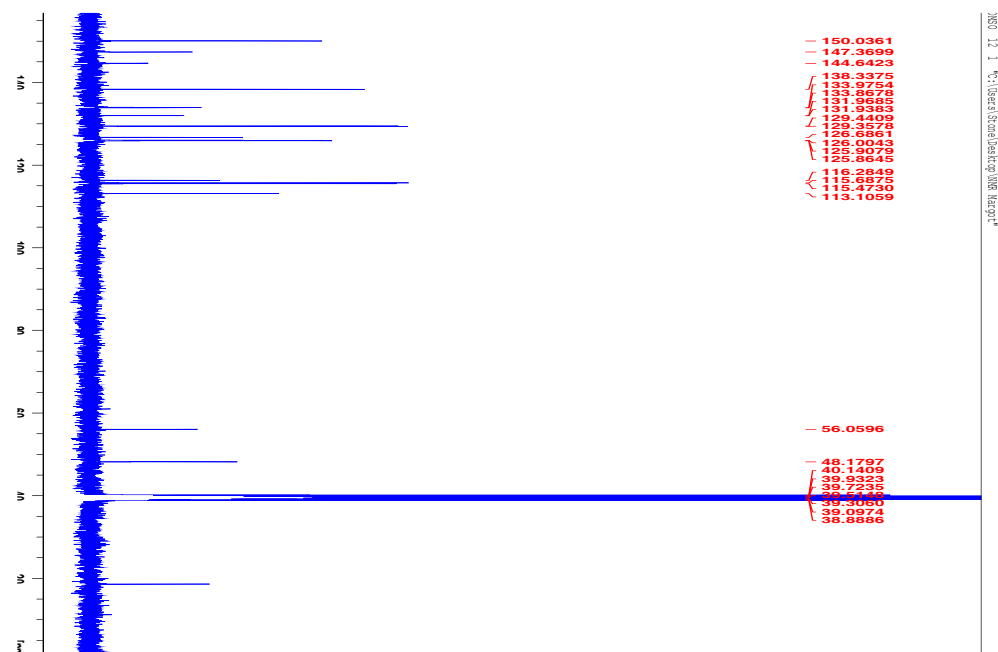Figure S16.  $^{13}\text{C}\{^1\text{H}\}$  NMR (100.61 MHz,  $\text{DMSO}-d_6$ ) spectrum of complex **C7**.

## Complex C8

•  $^1\text{H}$  NMR: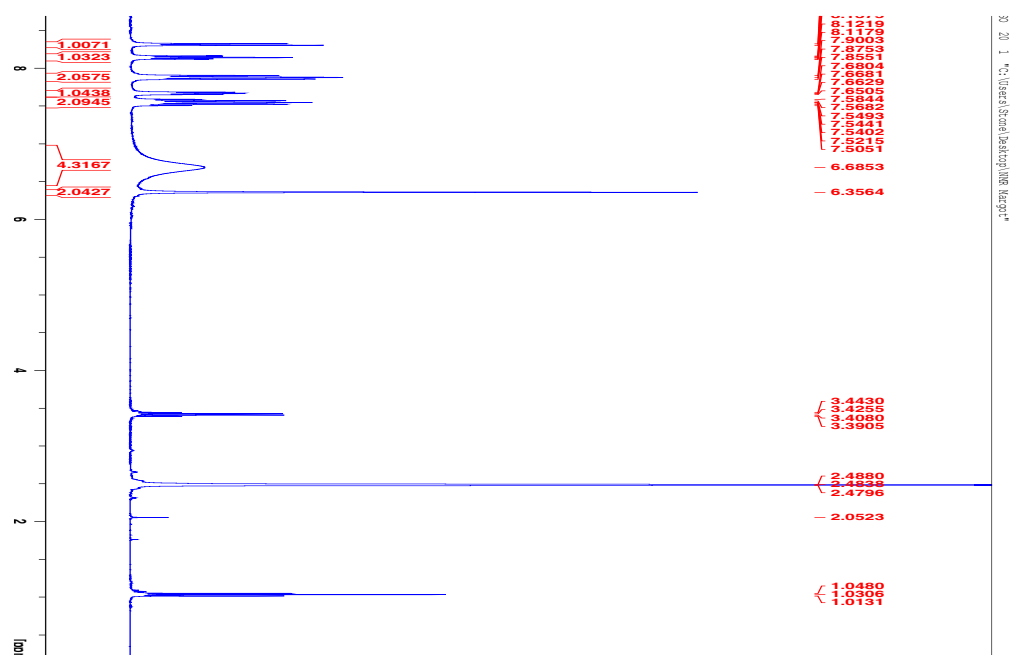Figure S17.  $^1\text{H}$  NMR (400.13 MHz, DMSO- $d_6$ ) spectrum of complex **C8**.•  $^{13}\text{C}\{^1\text{H}\}$  NMR: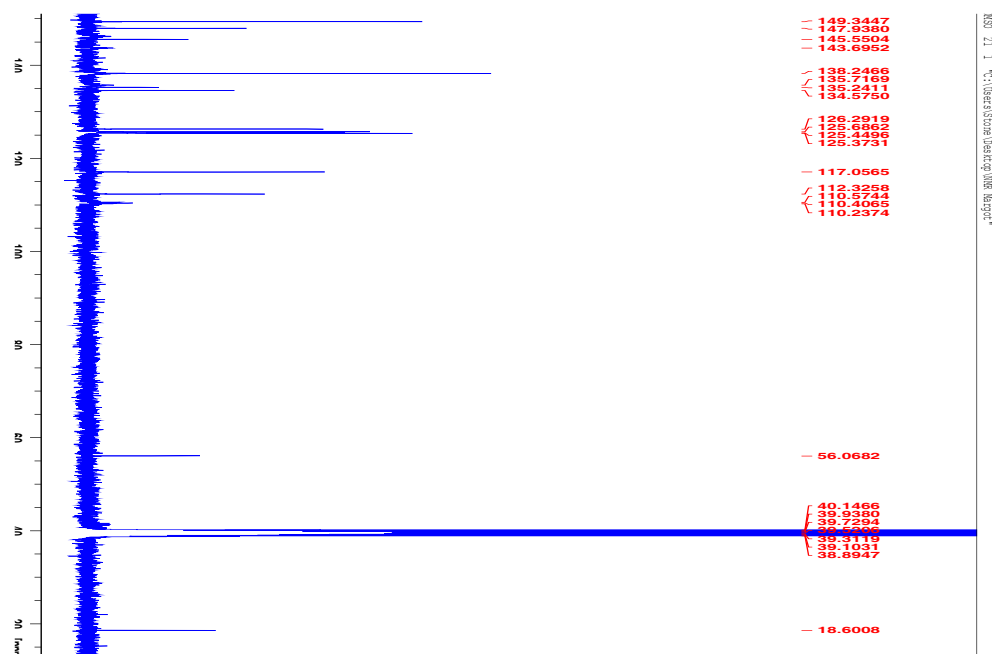Figure S18.  $^{13}\text{C}\{^1\text{H}\}$  NMR (100.61 MHz, DMSO- $d_6$ ) spectrum of complex **C8**.

## Complex C9

•  $^1\text{H}$  NMR: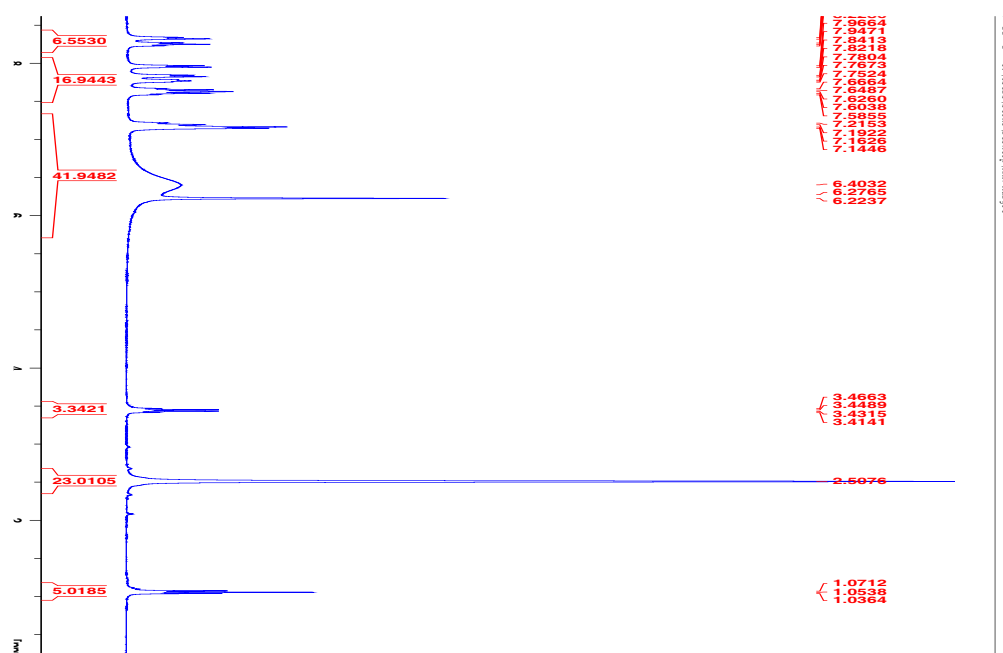Figure S19.  $^1\text{H}$  NMR (400.13 MHz, DMSO- $d_6$ ) spectrum of complex C9.•  $^{13}\text{C}\{^1\text{H}\}$  NMR: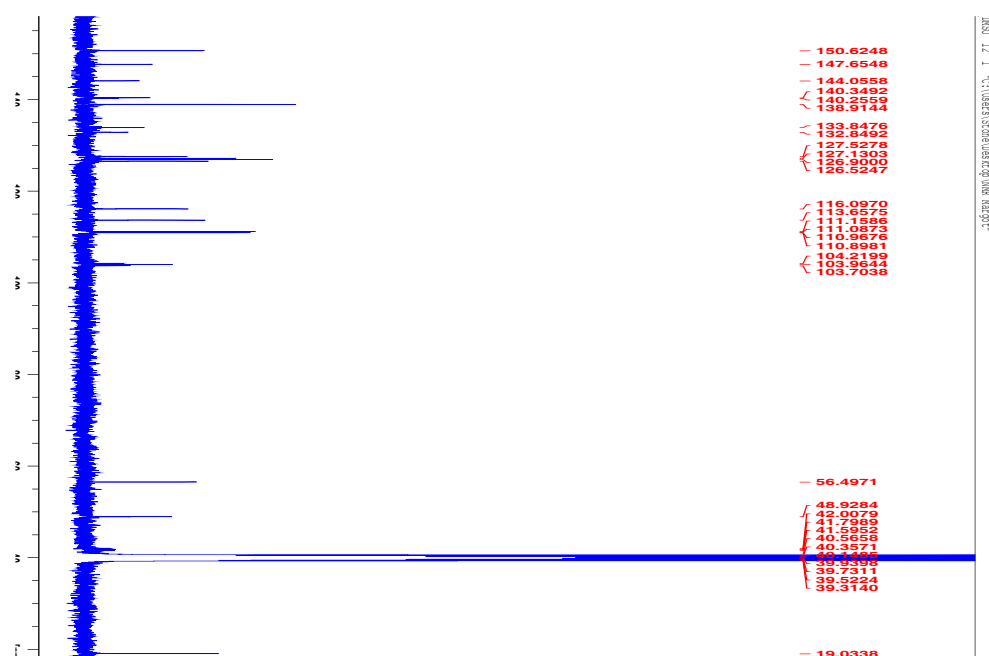Figure S20.  $^{13}\text{C}\{^1\text{H}\}$  NMR (100.61 MHz, DMSO- $d_6$ ) spectrum of complex C9.

**Complex 11**•  $^1\text{H}$  NMR: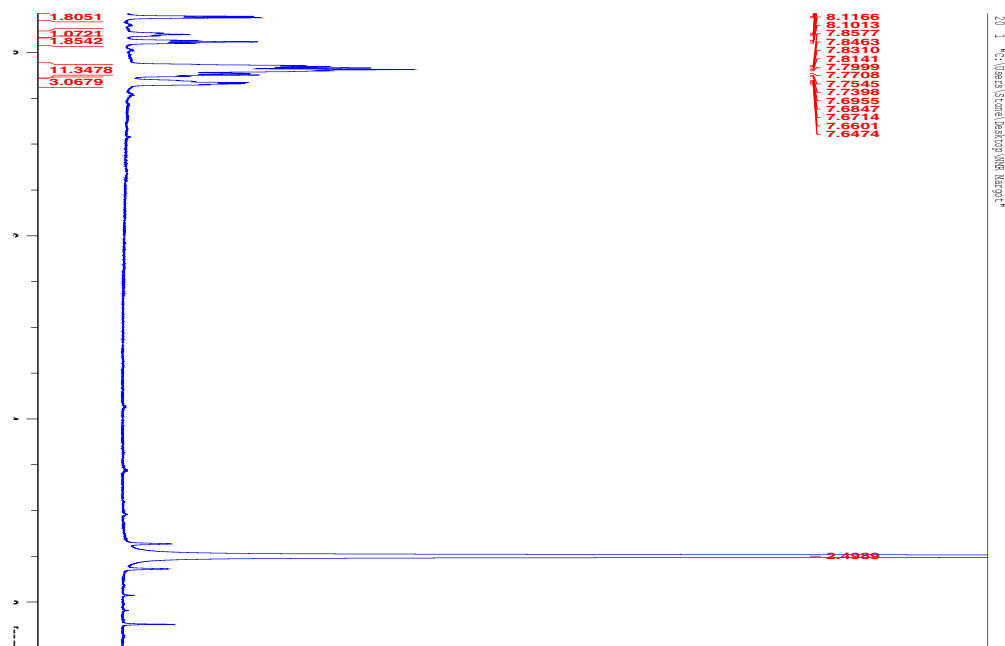Figure S21.  $^1\text{H}$  NMR (500.17 MHz,  $\text{DMSO}-d_6$ ) spectrum of complex **C11**.•  $^{13}\text{C}\{^1\text{H}\}$  NMR: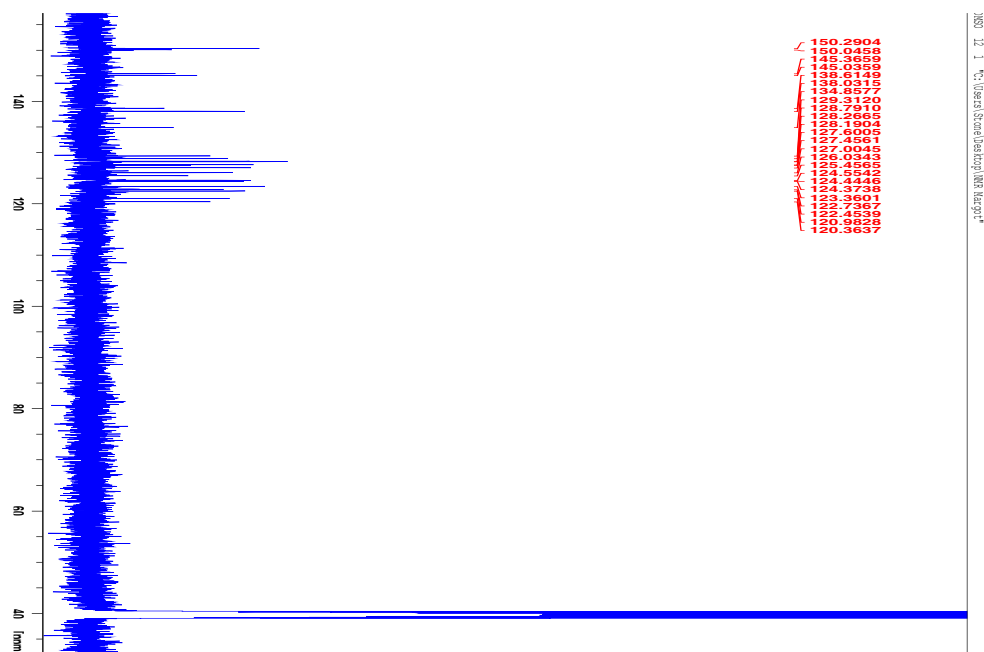Figure S22.  $^{13}\text{C}\{^1\text{H}\}$  NMR (125.77 MHz,  $\text{DMSO}-d_6$ ) spectrum of complex **C11**.

- $^1\text{H}$  NMR:

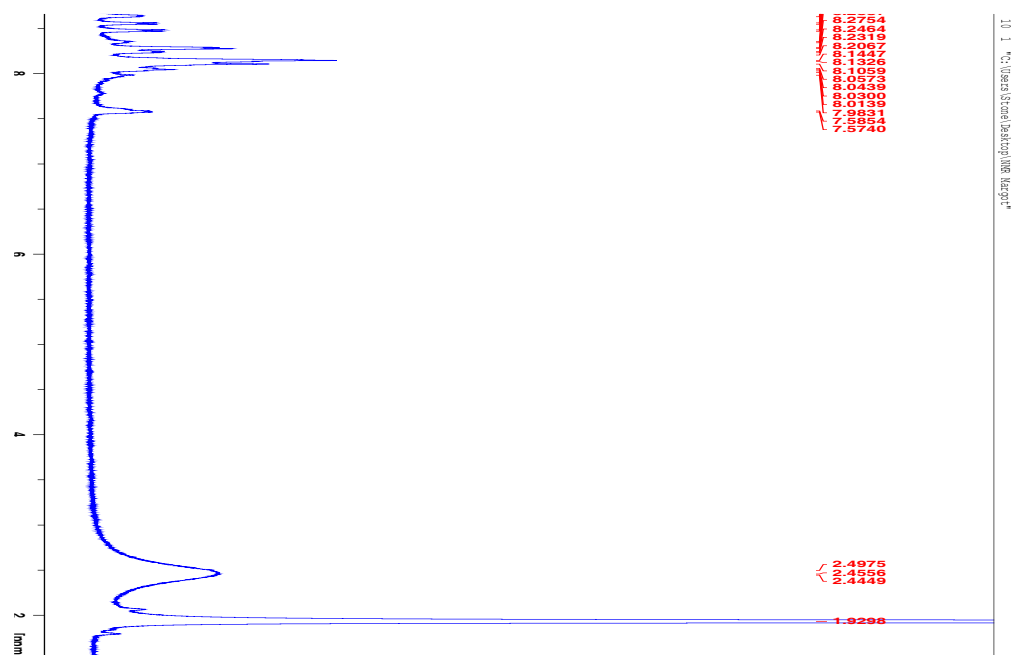

Figure S23.  $^1\text{H}$  NMR (500.17 MHz,  $\text{MeCN-}d_3$ ) spectrum of complex **C12**.

- $^{13}\text{C}\{^1\text{H}\}$  NMR:

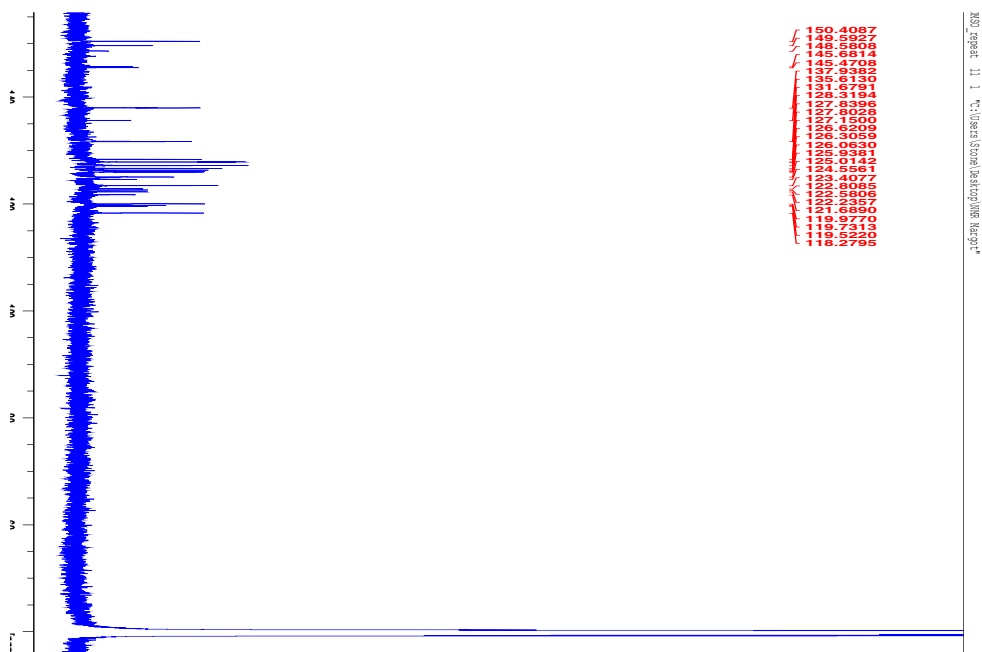

Figure S24.  $^{13}\text{C}\{^1\text{H}\}$  NMR (125.77 MHz, DMSO- $d_6$ ) spectrum of complex **C12**.

## S2. Photophysical properties

- Absorption and emission

### Ligand L1

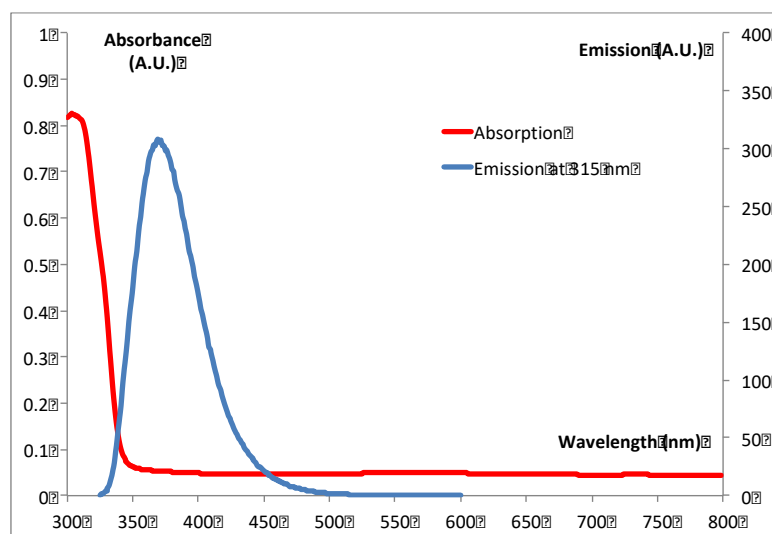

Quantum yield in DMSO at 298K:  
60%

(Concentration:  $3.3 \cdot 10^{-5} \text{M}$ )

UV-Vis (DMSO):  $\lambda_{\text{max}}$  (nm) ( $\epsilon$ ,  $\text{cm}^{-1} \cdot \text{mol}^{-1} \cdot \text{dm}^3$ ) 311 (20260).

Figure S25: Absorption and emission spectra of ligand L1.

### Complex C1

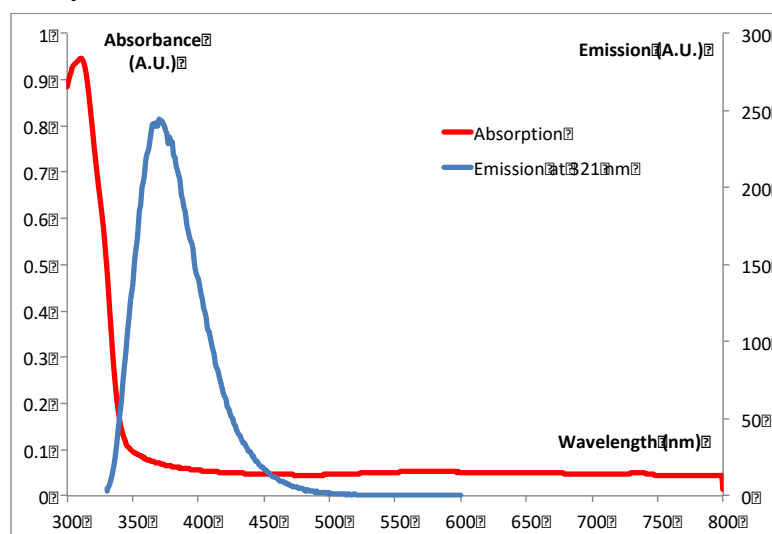

Quantum yield in DMSO at 298K:  
48%

(Concentration:  $3.3 \cdot 10^{-5} \text{M}$ )

UV-Vis (DMSO):  $\lambda_{\text{max}}$  (nm) ( $\epsilon$ ,  $\text{cm}^{-1} \cdot \text{mol}^{-1} \cdot \text{dm}^3$ ) 311 (23949).

Figure S26: Absorption and emission spectra of complex C1.

**Ligand L2**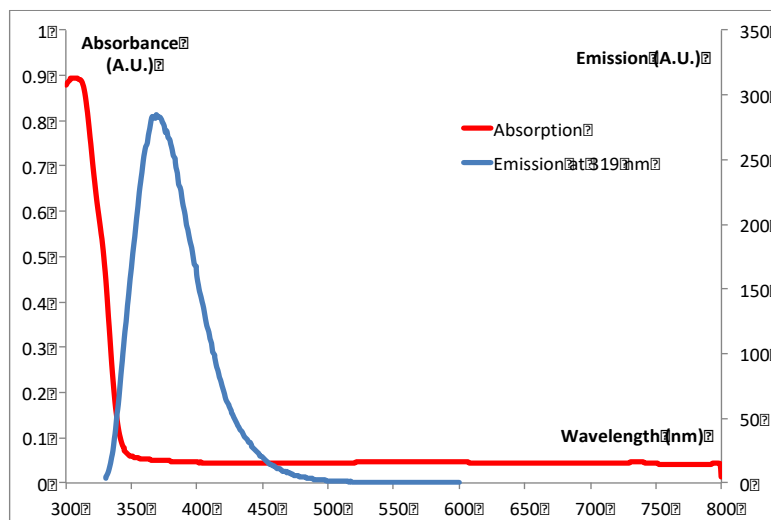

Quantum yield in DMSO at 298K:  
54%

(Concentration:  $3.3 \cdot 10^{-5}$  M)  
UV-Vis (DMSO):  $\lambda_{\max}$  (nm)  
( $\epsilon$ ,  $\text{cm}^{-1} \cdot \text{mol}^{-1} \cdot \text{dm}^3$ ) 312 (21645).

Figure S27: Absorption and emission spectra of ligand **L2**.

**Complex C2**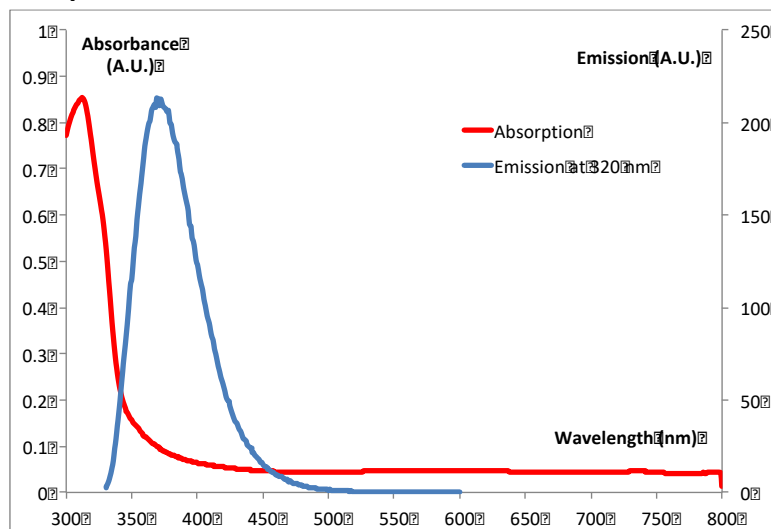

Quantum yield in DMSO at 298K:  
39%

(Concentration:  $3.3 \cdot 10^{-5}$  M)  
UV-Vis (DMSO):  $\lambda_{\max}$  (nm)  
( $\epsilon$ ,  $\text{cm}^{-1} \cdot \text{mol}^{-1} \cdot \text{dm}^3$ ) 313 (21654).

Figure S28: Absorption and emission spectra of complex **C2**.

**Ligand L3**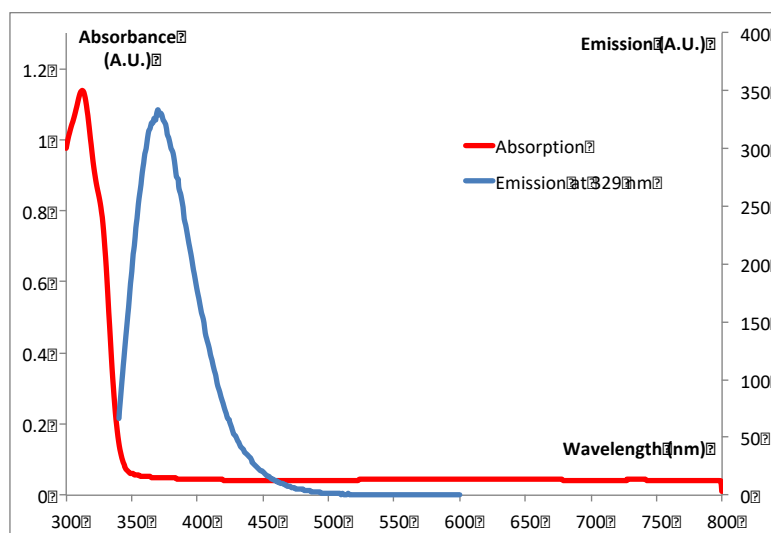

Quantum yield in DMSO at 298K:  
50%

(Concentration:  $3.3 \cdot 10^{-5}$  M)  
UV-Vis (DMSO):  $\lambda_{\max}$  (nm)  
( $\epsilon$ ,  $\text{cm}^{-1} \cdot \text{mol}^{-1} \cdot \text{dm}^3$ ) 313 (27357).

Figure S29: Absorption and emission spectra of ligand **L3**.

**Complex C3**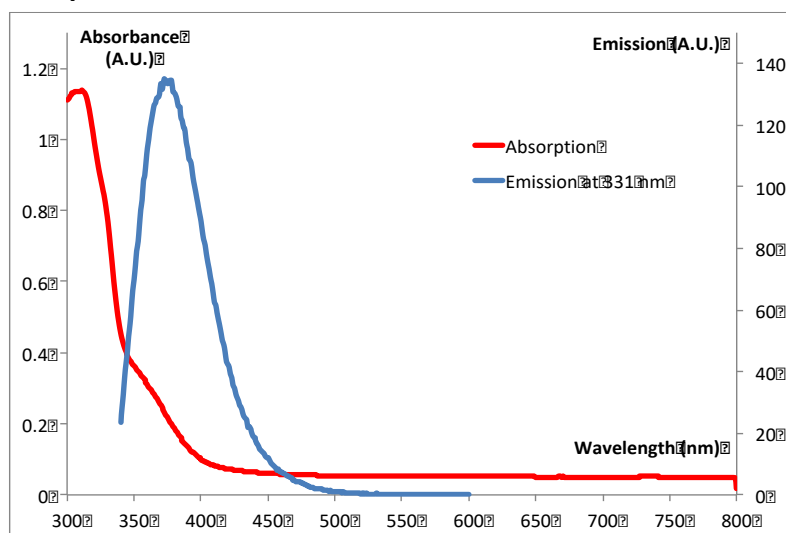

Quantum yield in DMSO at 298K:  
27%  
(Concentration:  $6.6 \cdot 10^{-5} \text{M}$ )  
UV-Vis (DMSO):  $\lambda_{\text{max}}$  (nm)  
( $\epsilon$ ,  $\text{cm}^{-1} \cdot \text{mol}^{-1} \cdot \text{dm}^3$ ) 312 (16006).

Figure S30: Absorption and emission spectra of complex **C3**.**Ligand L4**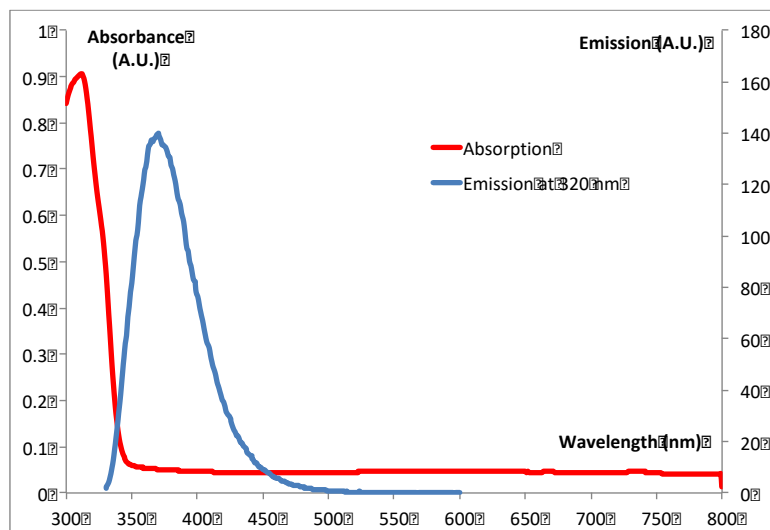

Quantum yield in DMSO at 298K:  
27%  
(Concentration:  $3.3 \cdot 10^{-5} \text{M}$ )  
UV-Vis (DMSO):  $\lambda_{\text{max}}$  (nm)  
( $\epsilon$ ,  $\text{cm}^{-1} \cdot \text{mol}^{-1} \cdot \text{dm}^3$ ) 312 (24729).

Figure S31: Absorption and emission spectra of ligand **L4**.**Complex C4**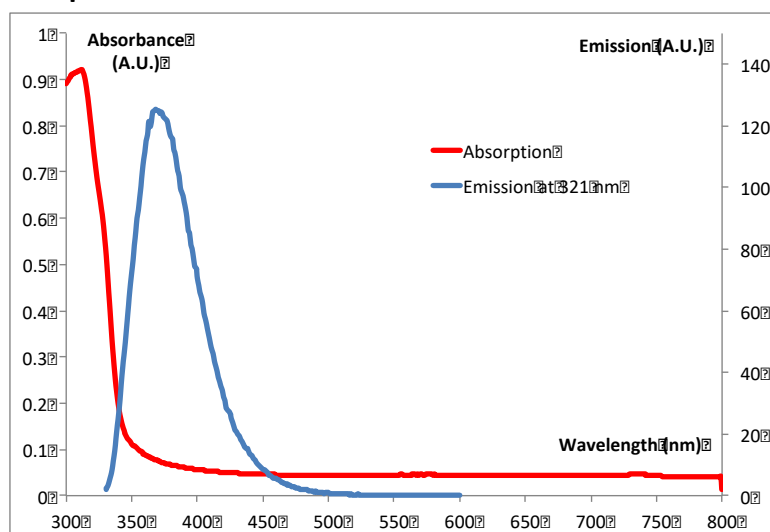

Quantum yield in DMSO at 298K:  
23%  
(Concentration:  $3.3 \cdot 10^{-5} \text{M}$ )  
UV-Vis (DMSO):  $\lambda_{\text{max}}$  (nm)  
( $\epsilon$ ,  $\text{cm}^{-1} \cdot \text{mol}^{-1} \cdot \text{dm}^3$ ) 313 (21527).

Figure S32: Absorption and emission spectra of complex **C4**.



**Ligand L5**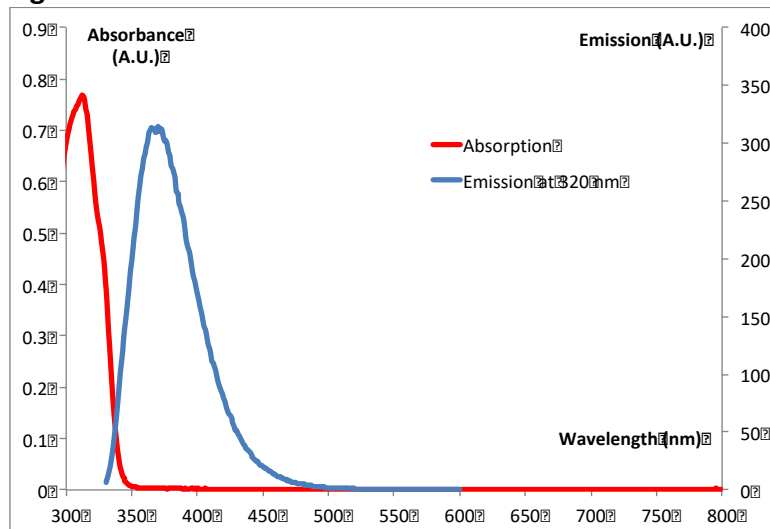

Quantum yield in DMSO at 298K:  
30%

(Concentration:  $4.2 \cdot 10^{-5} \text{M}$ )  
UV-Vis (DMSO):  $\lambda_{\text{max}}$  (nm)  
( $\epsilon$ ,  $\text{cm}^{-1} \cdot \text{mol}^{-1} \cdot \text{dm}^3$ ) 313 (14123).

Figure S33: Absorption and emission spectra of ligand **L5**.**Complex C5**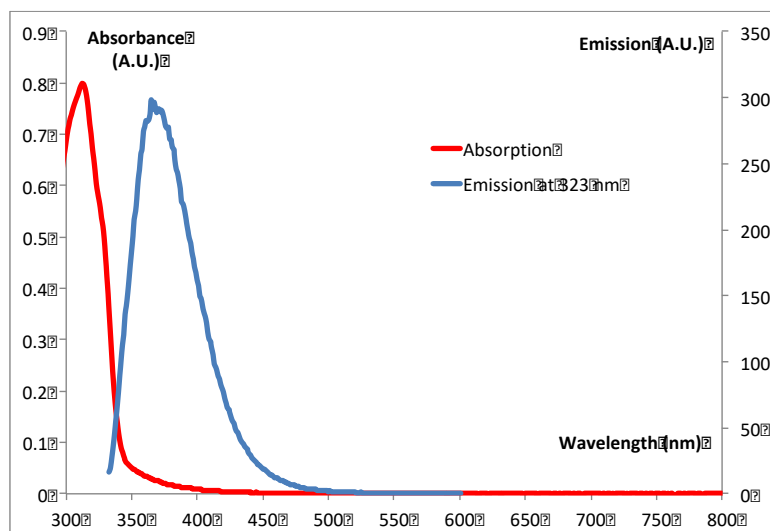

Quantum yield in DMSO at 298K:  
29%

(Concentration:  $3.4 \cdot 10^{-5} \text{M}$ )  
UV-Vis (DMSO):  $\lambda_{\text{max}}$  (nm)  
( $\epsilon$ ,  $\text{cm}^{-1} \cdot \text{mol}^{-1} \cdot \text{dm}^3$ ) 312 (23448).

Figure S34: Absorption and emission spectra of complex **C5**.**Ligand L6**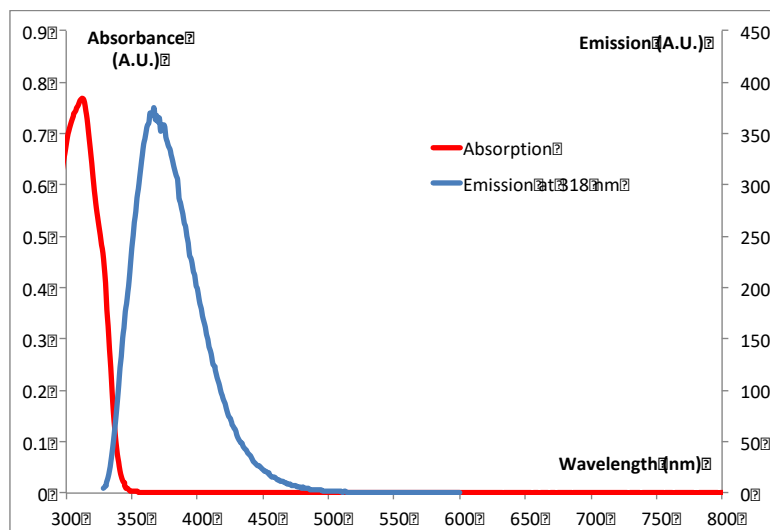

Quantum yield in DMSO at 298K:  
38%

(Concentration:  $3.3 \cdot 10^{-5} \text{M}$ )  
UV-Vis (DMSO):  $\lambda_{\text{max}}$  (nm)  
( $\epsilon$ ,  $\text{cm}^{-1} \cdot \text{mol}^{-1} \cdot \text{dm}^3$ ) 313 (23130).

Figure S35: Absorption and emission spectra of ligand **L6**.

**Complex C6**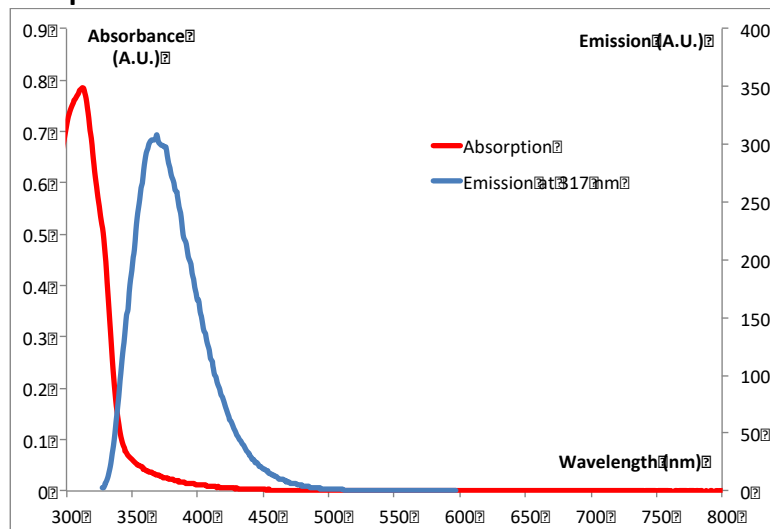

Quantum yield in DMSO at 298K:  
32%

(Concentration:  $2.7 \cdot 10^{-5} \text{M}$ )

UV-Vis (DMSO):  $\lambda_{\text{max}}$  (nm)  $(\epsilon, \text{cm}^{-1} \cdot \text{mol}^{-1} \cdot \text{dm}^3)$  312 (24699).

Figure S36: Absorption and emission spectra of complex **C6**.

**Ligand L7**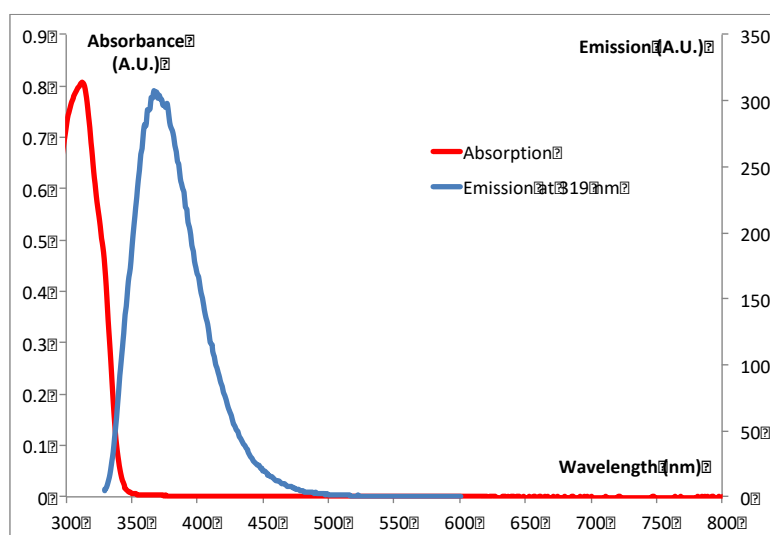

Quantum yield in DMSO at 298K:  
32%

(Concentration:  $3.8 \cdot 10^{-5} \text{M}$ )

UV-Vis (DMSO):  $\lambda_{\text{max}}$  (nm)  $(\epsilon, \text{cm}^{-1} \cdot \text{mol}^{-1} \cdot \text{dm}^3)$  312 (21244).

Figure S37: Absorption and emission spectra of ligand **L7**.

**Complex C7**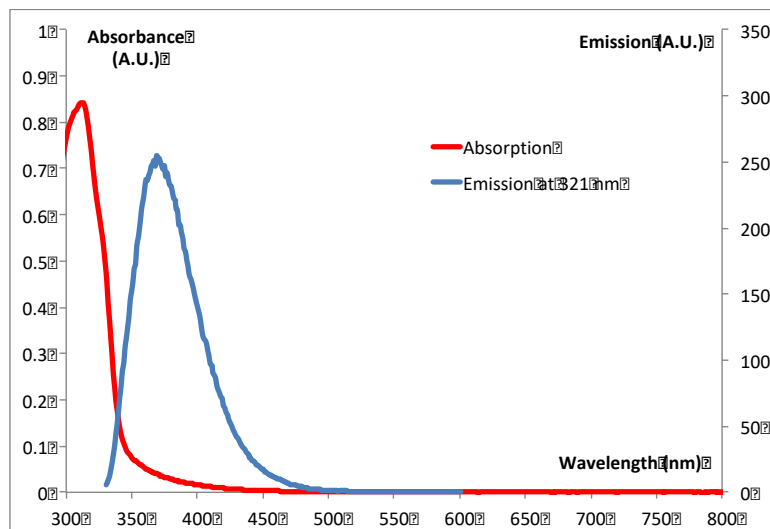

Quantum yield in DMSO at 298K:  
26%

(Concentration:  $2.6 \cdot 10^{-5} \text{M}$ )

UV-Vis (DMSO):  $\lambda_{\text{max}}$  (nm)  $(\epsilon, \text{cm}^{-1} \cdot \text{mol}^{-1} \cdot \text{dm}^3)$  312 (25542).

Figure S38: Absorption and emission spectra of complex **C7**.

**Ligand L8**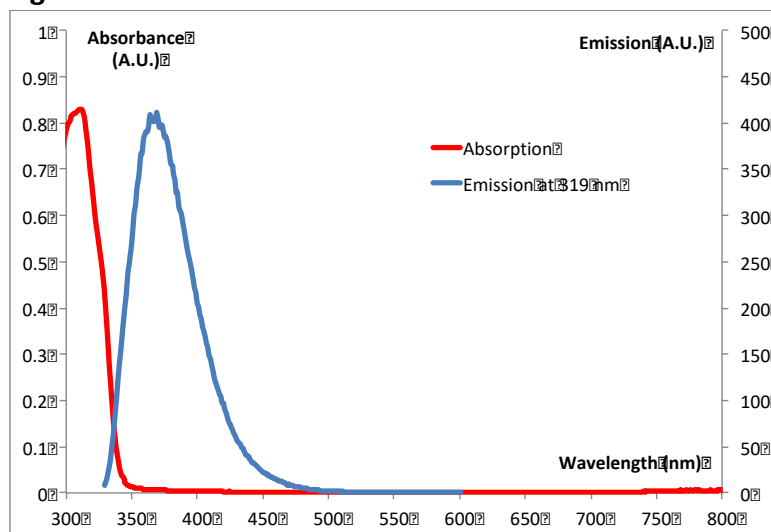

Quantum yield in DMSO at 298K:  
42%  
(Concentration:  $2.4 \cdot 10^{-5} \text{M}$ )  
UV-Vis (DMSO):  $\lambda_{\text{max}}$  (nm) ( $\epsilon$ ,  $\text{cm}^{-1} \cdot \text{mol}^{-1} \cdot \text{dm}^3$ ) 312 (29031).

Figure S39: Absorption and emission spectra of ligand **L8**.**Complex C8**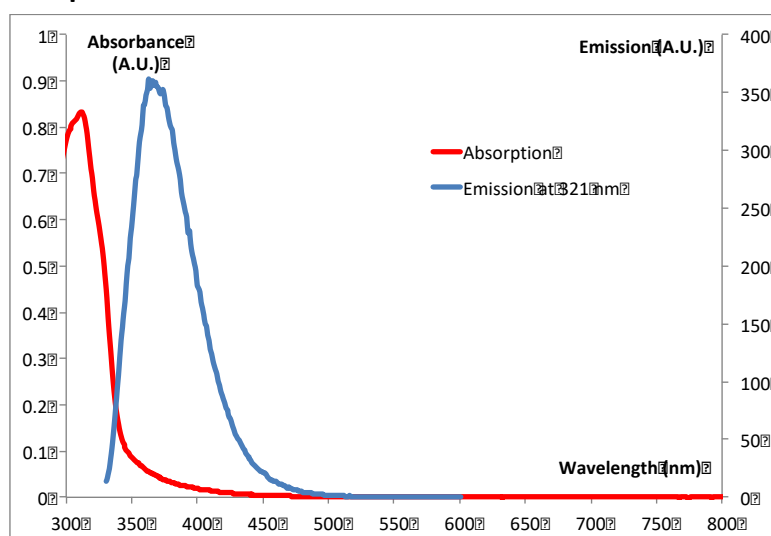

Quantum yield in DMSO at 298K:  
36%  
(Concentration:  $2.9 \cdot 10^{-5} \text{M}$ )  
UV-Vis (DMSO):  $\lambda_{\text{max}}$  (nm) ( $\epsilon$ ,  $\text{cm}^{-1} \cdot \text{mol}^{-1} \cdot \text{dm}^3$ ) 311 (23441).

Figure S40: Absorption and emission spectra of complex **C8**.**Ligand L9**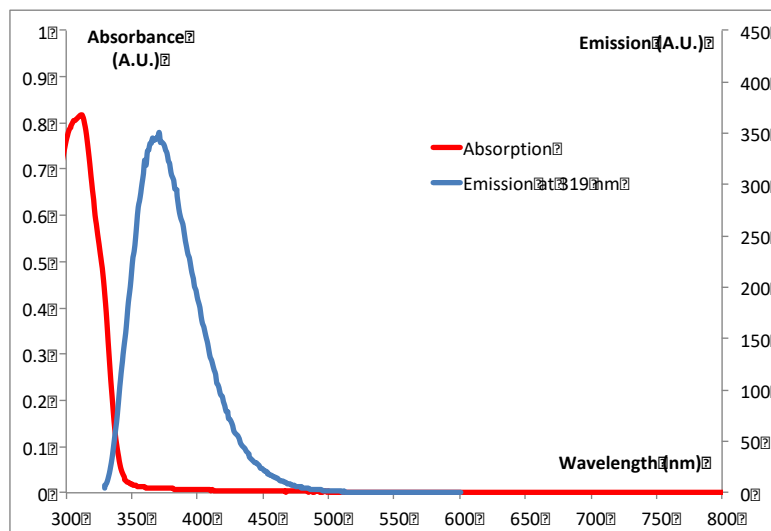

Quantum yield in DMSO at 298K:  
36%  
(Concentration:  $3.1 \cdot 10^{-5} \text{M}$ )  
UV-Vis (DMSO):  $\lambda_{\text{max}}$  (nm) ( $\epsilon$ ,  $\text{cm}^{-1} \cdot \text{mol}^{-1} \cdot \text{dm}^3$ ) 312 (22425).

Figure S41: Absorption and emission spectra of ligand **L9**.

**Complex C9**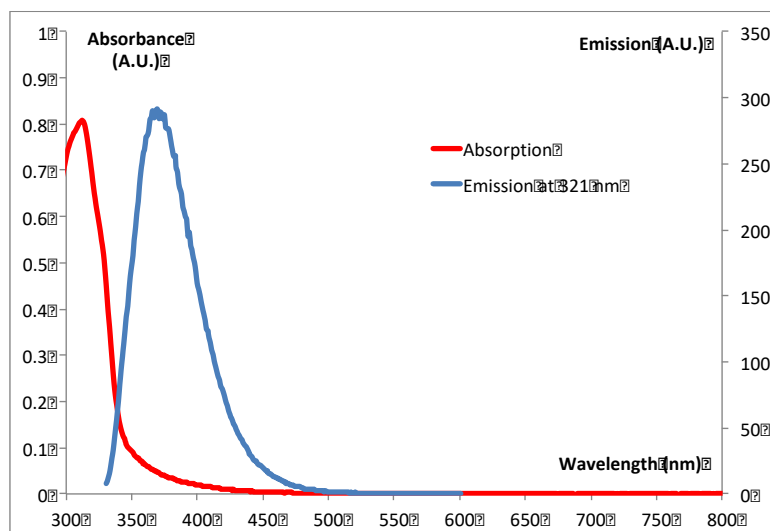

Quantum yield in DMSO at 298K:  
30%

(Concentration:  $3.0 \cdot 10^{-5}$  M)  
UV-Vis (DMSO):  $\lambda_{\text{max}}$  (nm) ( $\epsilon$ ,  $\text{cm}^{-1} \cdot \text{mol}^{-1} \cdot \text{dm}^3$ ) 313 (14367).

Figure S42: Absorption and emission spectra of complex **C9**.

**Ligand L10**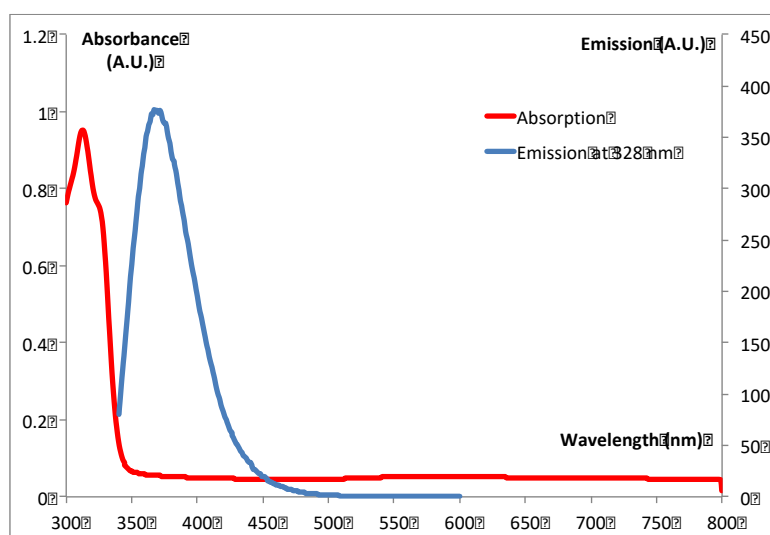

Quantum yield in DMSO at 298K:  
69%

(Concentration:  $3.3 \cdot 10^{-5}$  M)  
UV-Vis (DMSO):  $\lambda_{\text{max}}$  (nm) ( $\epsilon$ ,  $\text{cm}^{-1} \cdot \text{mol}^{-1} \cdot \text{dm}^3$ ) 313 (24475).

Figure S43: Absorption and emission spectra of ligand **L10**.

**Complex C10**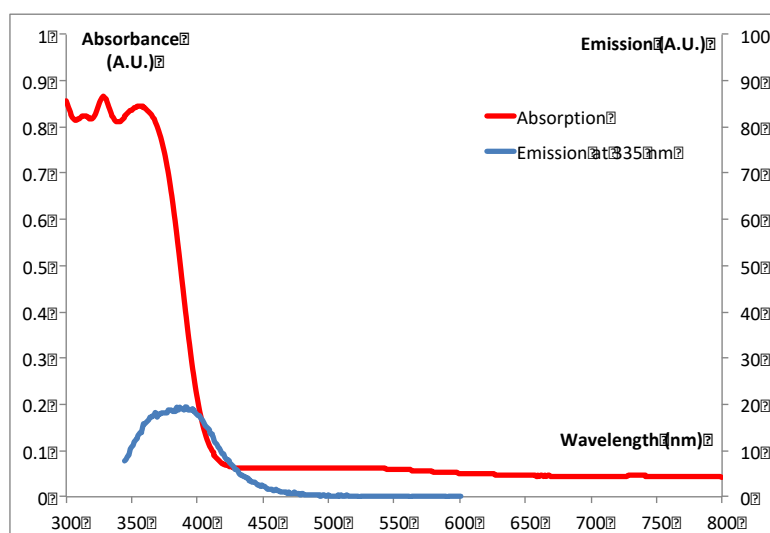

Quantum yield in DMSO at 298K: 4%

(Concentration:  $5.0 \cdot 10^{-5}$  M)  
UV-Vis (DMSO):  $\lambda_{\text{max}}$  (nm) ( $\epsilon$ ,  $\text{cm}^{-1} \cdot \text{mol}^{-1} \cdot \text{dm}^3$ ) 328 (12883).

Figure S44: Absorption and emission spectra of complex **C10**.

**Ligand L11**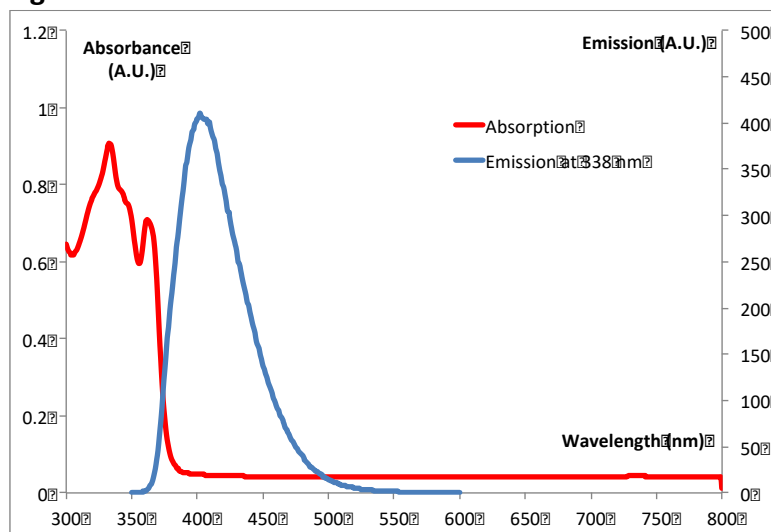

Quantum yield in DMSO at 298K:  
74%

(Concentration:  $4.0 \cdot 10^{-5}$  M)

UV-Vis (DMSO):  $\lambda_{\max}$  (nm) ( $\epsilon$ ,  $\text{cm}^{-1} \cdot \text{mol}^{-1} \cdot \text{dm}^3$ ) 333 (20088), 362 (15966).

Figure S45: Absorption and emission spectra of ligand **L11**.

**Complex C11**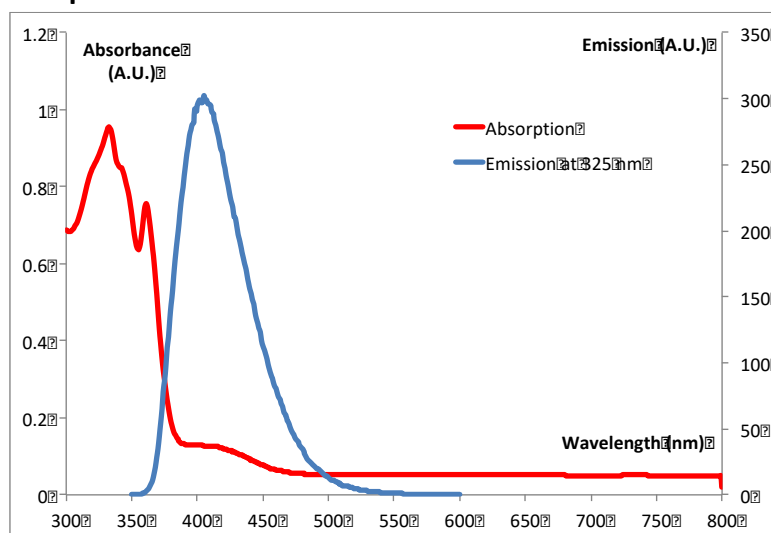

Quantum yield in DMSO at 298K:  
56%

(Concentration:  $5.6 \cdot 10^{-5}$  M)

UV-Vis (DMSO):  $\lambda_{\max}$  (nm) ( $\epsilon$ ,  $\text{cm}^{-1} \cdot \text{mol}^{-1} \cdot \text{dm}^3$ ) 333 (20891), 362 (16528).

Figure S46: Absorption and emission spectra of complex **C11**.

**Ligand L12**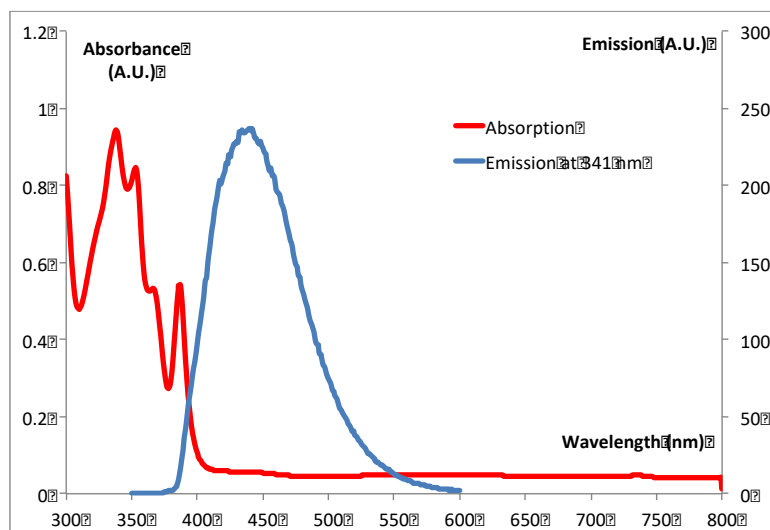Figure S47: Absorption and emission spectra of ligand **L12**.

Quantum yield in DMSO at 298K:

61%

(Concentration:  $3.3 \cdot 10^{-5} \text{M}$ )

UV-Vis (DMSO):  $\lambda_{\text{max}}$  (nm) ( $\epsilon$ ,  $\text{cm}^{-1} \cdot \text{mol}^{-1} \cdot \text{dm}^3$ ) 338 (25928), 353 (24139), 366 (15420), 387 (15708).

**Complex C12**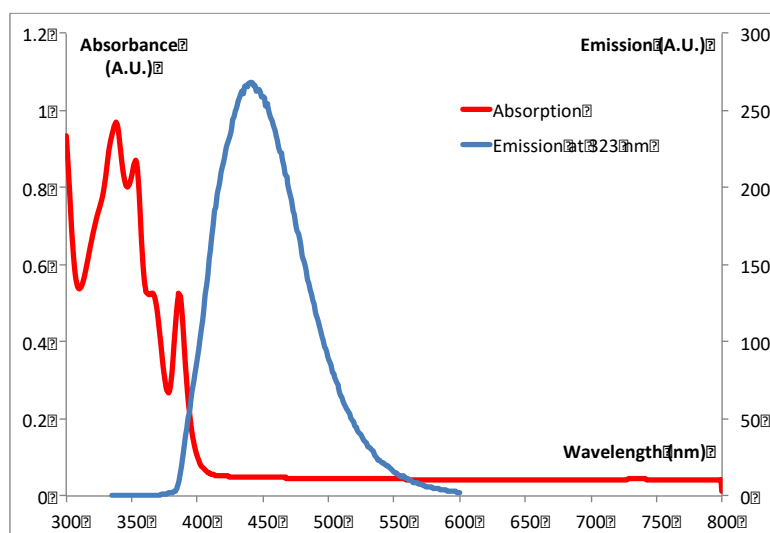Figure S48: Absorption and emission spectra of complex **C12**.

Quantum yield in DMSO at 298K:

71%

(Concentration:  $2.2 \cdot 10^{-5} \text{M}$ )

UV-Vis (DMSO):  $\lambda_{\text{max}}$  (nm) ( $\epsilon$ ,  $\text{cm}^{-1} \cdot \text{mol}^{-1} \cdot \text{dm}^3$ ) 338 (28904), 353 (28264), 366 (19892), 388 (20031).

### S3. Stability studies by UV-visible spectrophotometry

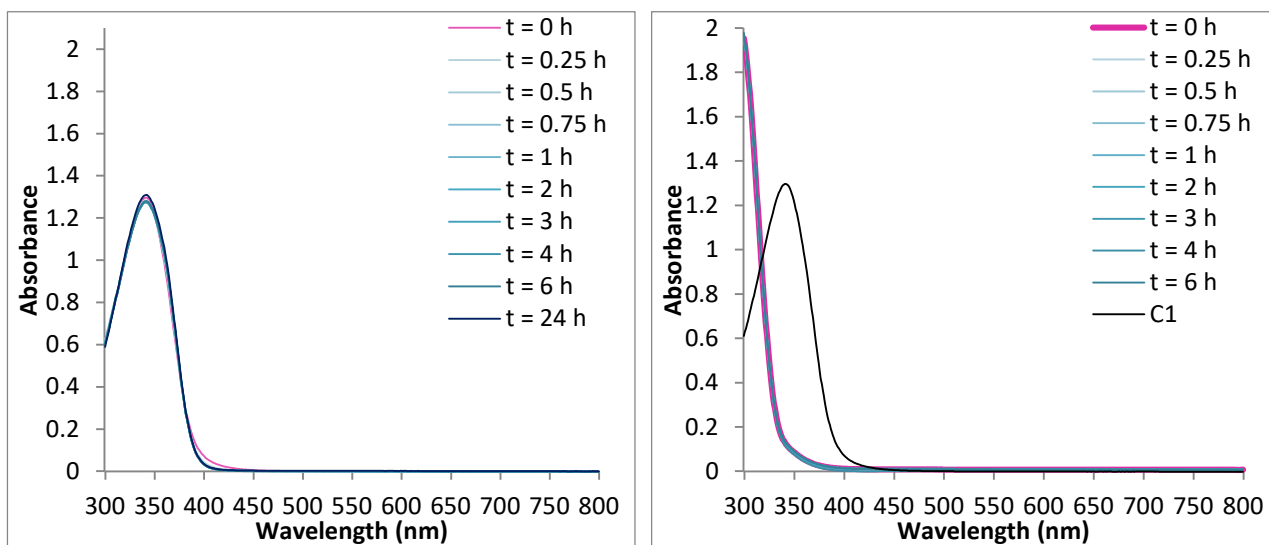

**Figure S49:** UV-Visible spectra of the Au(III) complex **C1** ( $10^{-4}$  M) in PBS (pH 7.4) recorded over time (left); and of **C1** before and after addition of GSH (2 eq.) recorded over time at room temperature (right).

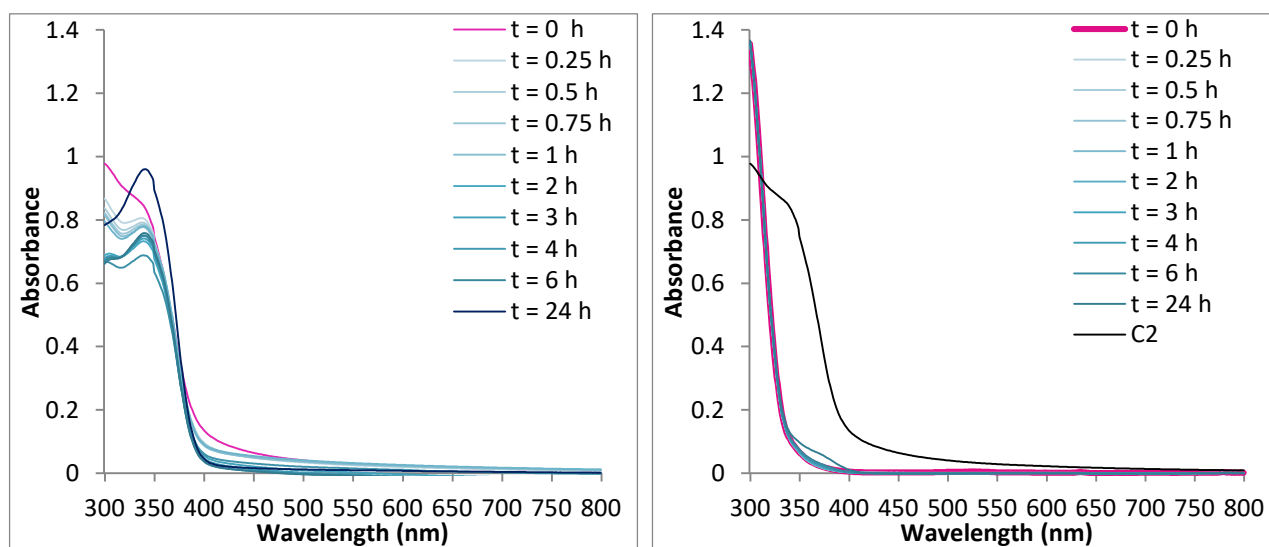

**Figure S50:** UV-Visible spectra of the Au(III) complex **C2** ( $10^{-4}$  M) in PBS (pH 7.4) recorded over time (left); and of **C2** before and after addition of GSH (2 eq.) recorded over time at room temperature (right).

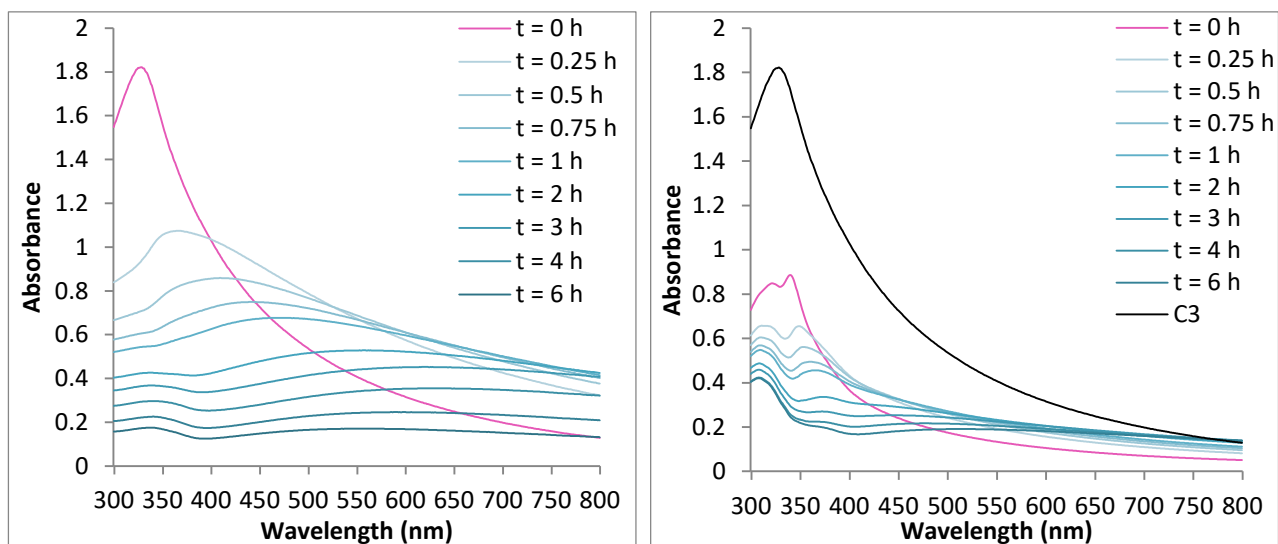

**Figure S51:** UV-Visible spectra of the Au(III) complex **C3** ( $10^{-4}$  M) in PBS (pH 7.4) recorded over time (left); and of **C3** before and after addition of GSH (2 eq.) recorded over time at room temperature (right).

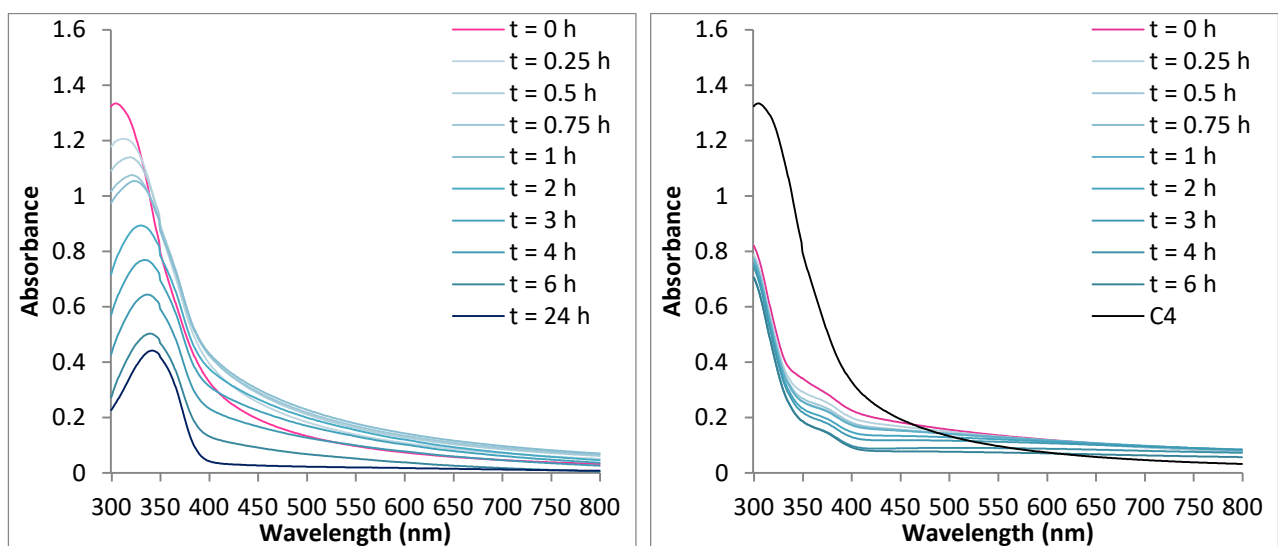

**Figure S52:** UV-Visible spectra of the Au(III) complex **C4** ( $10^{-4}$  M) in PBS (pH 7.4) recorded over time (left); and of **C4** before and after addition of GSH (2 eq.) recorded over time at room temperature (right).



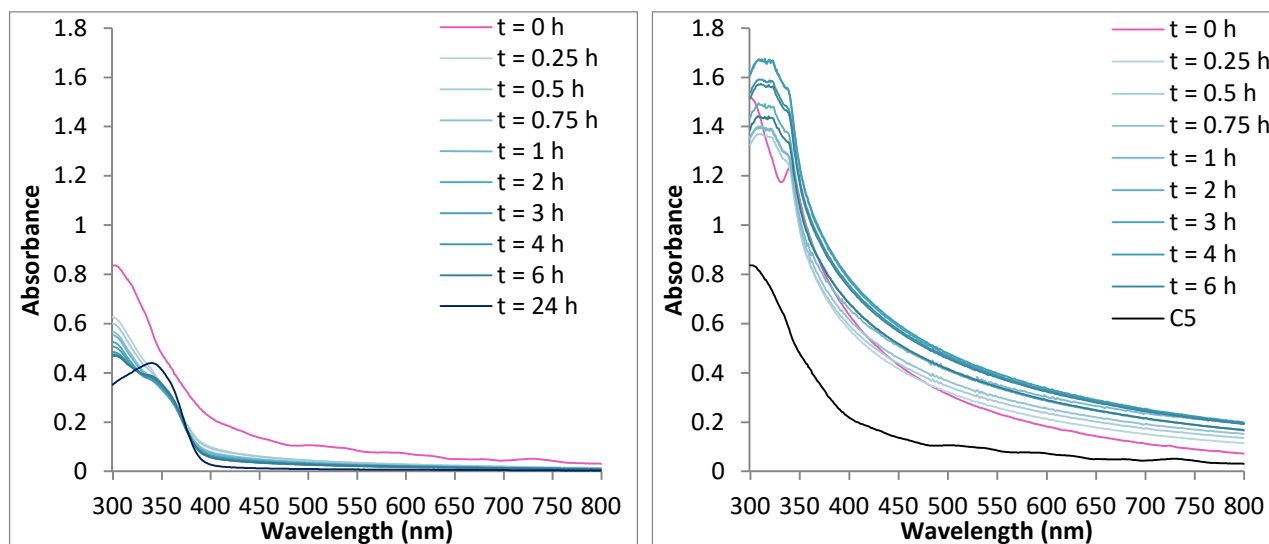

**Figure S53:** UV-Visible spectra of the Au(III) complex **C5** ( $10^{-4}$  M) in PBS (pH 7.4) recorded over time (left); and of **C5** before and after addition of GSH (2 eq.) recorded over time at room temperature (right).

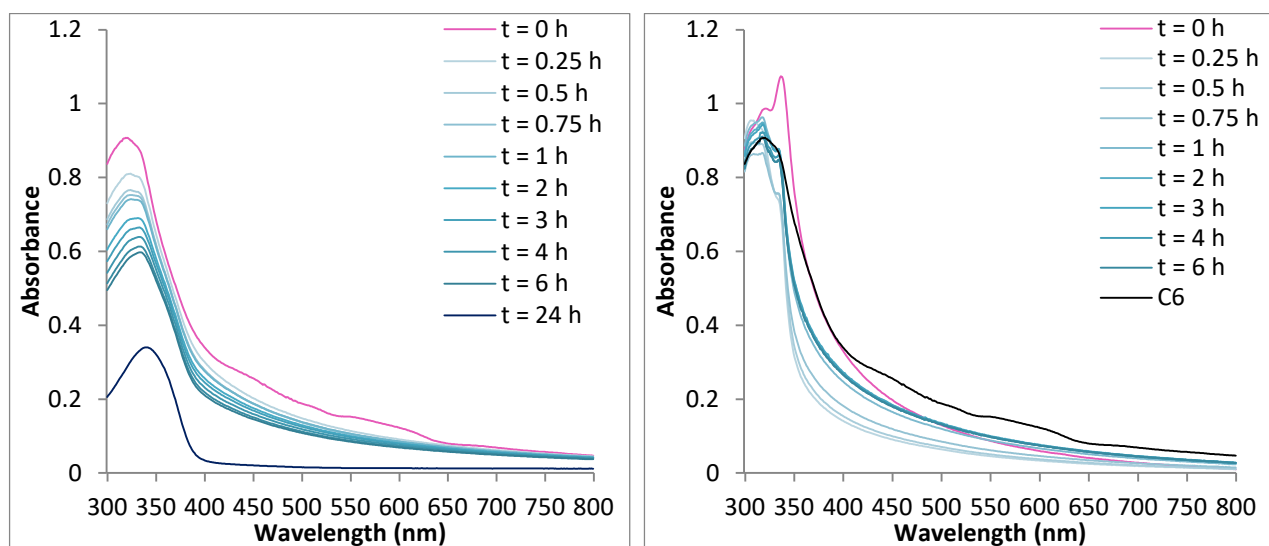

**Figure S54:** UV-Visible spectra of the Au(III) complex **C6** ( $10^{-4}$  M) in PBS (pH 7.4) recorded over time (left); and of **C6** before and after addition of GSH (2 eq.) recorded over time at room temperature (right).

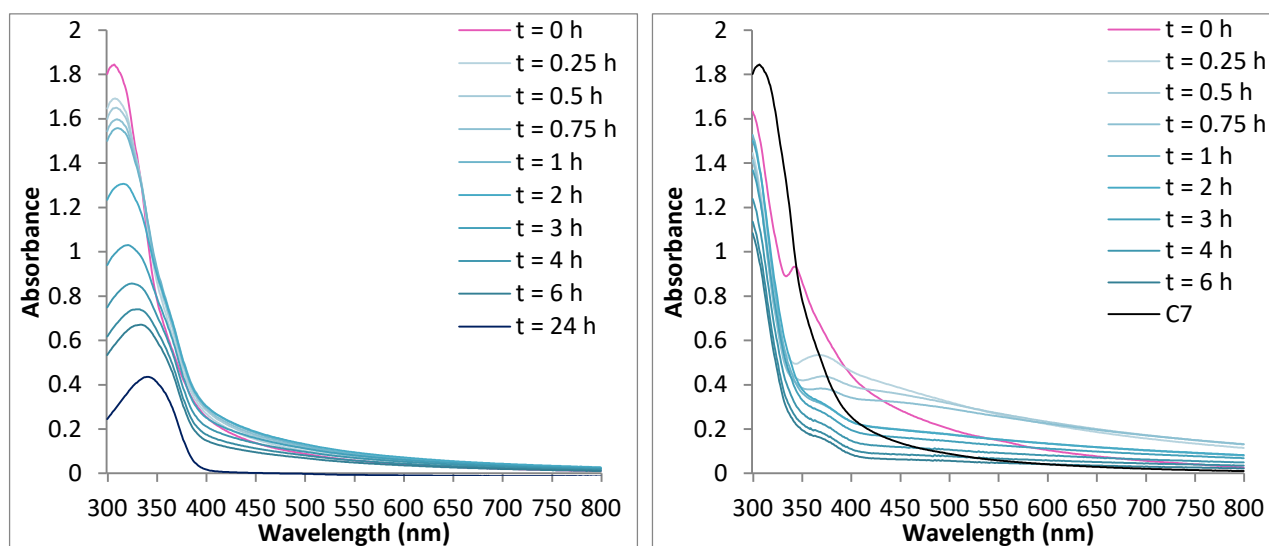

**Figure S55:** UV-Visible spectra of the Au(III) complex **C7** ( $10^{-4}$  M) in PBS (pH 7.4) recorded over time (left); and of **C7** before and after addition of GSH (2 eq.) recorded over time at room temperature (right).

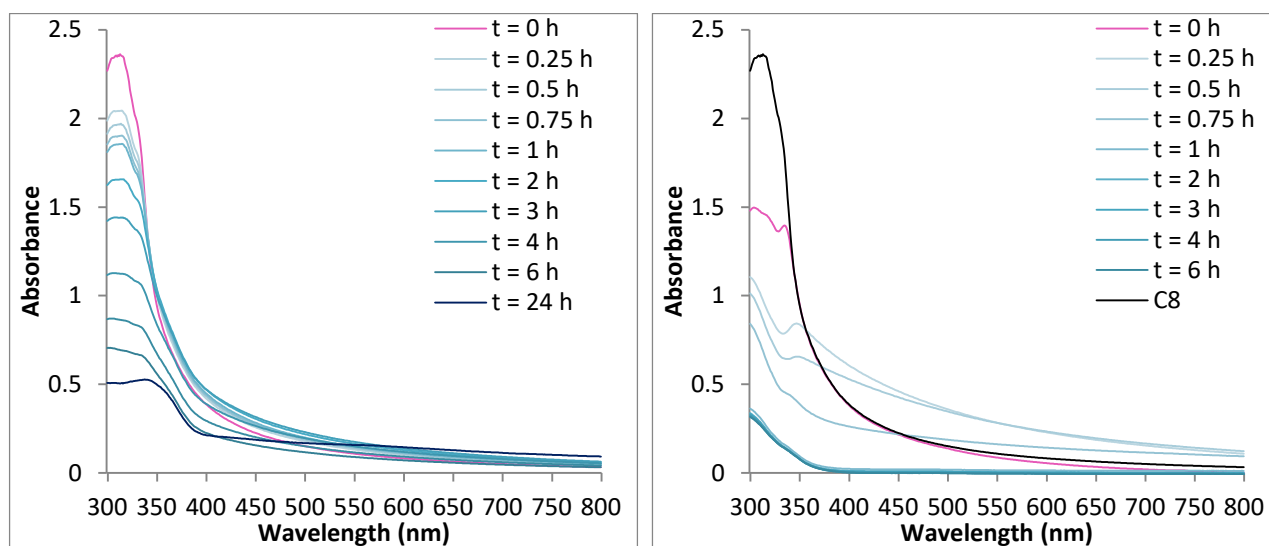

**Figure S56:** UV-Visible spectra of the Au(III) complex **C8** ( $10^{-4}$  M) in PBS (pH 7.4) recorded over time (left); and of **C8** before and after addition of GSH (2 eq.) recorded over time at room temperature (right).

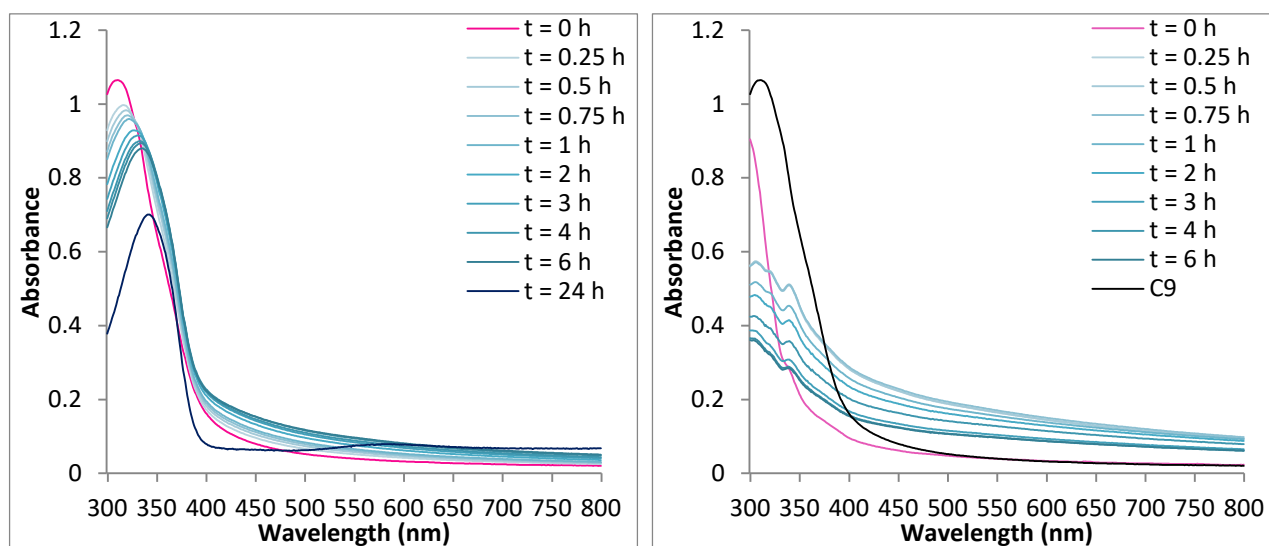

**Figure S57:** UV-Visible spectra of the Au(III) complex **C9** ( $10^{-4}$  M) in PBS (pH 7.4) recorded over time (left); and of **C9** before and after addition of GSH (2 eq.) recorded over time at room temperature (right).

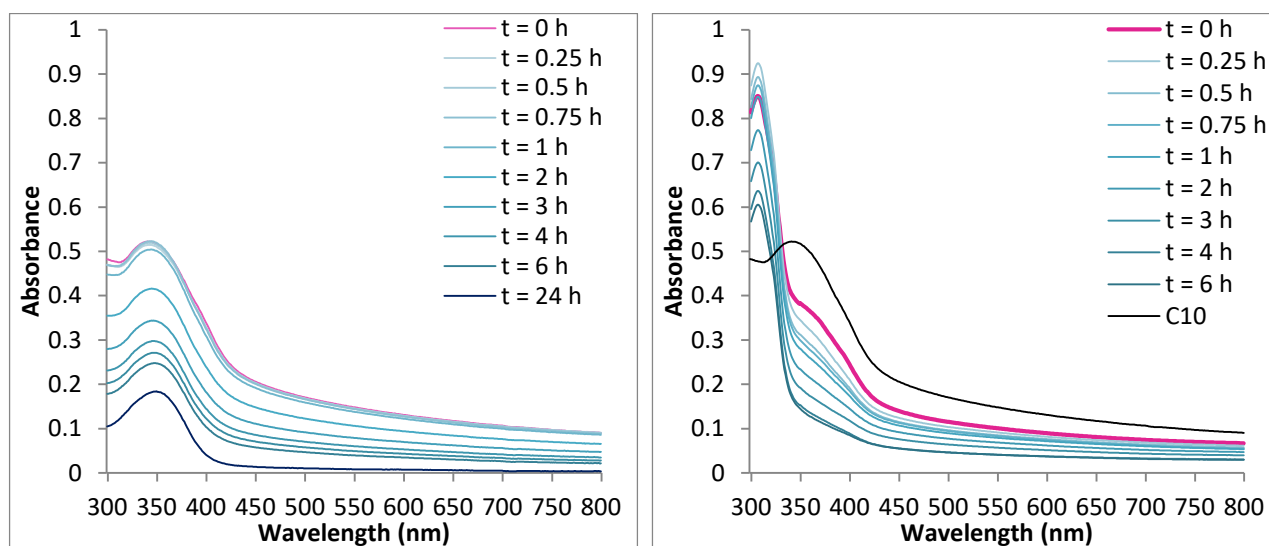

**Figure S58:** UV-Visible spectra of the Au(III) complex **C10** ( $10^{-4}$  M) in PBS (pH 7.4) recorded over time (left); and of **C10** before and after addition of GSH (2 eq.) recorded over time at room temperature (right).

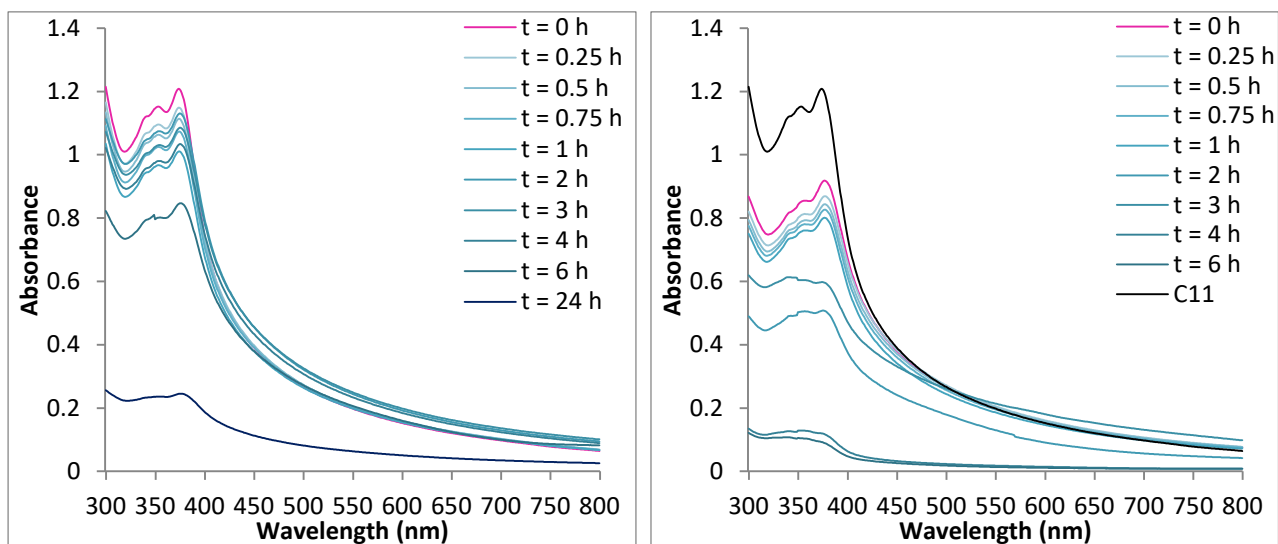

**Figure S59:** UV-Visible spectra of the Au(III) complex **C11** ( $10^{-4}$  M) in PBS (pH 7.4) recorded over time (left); and of **C11** before and after addition of GSH (2 eq.) recorded over time at room temperature (right).

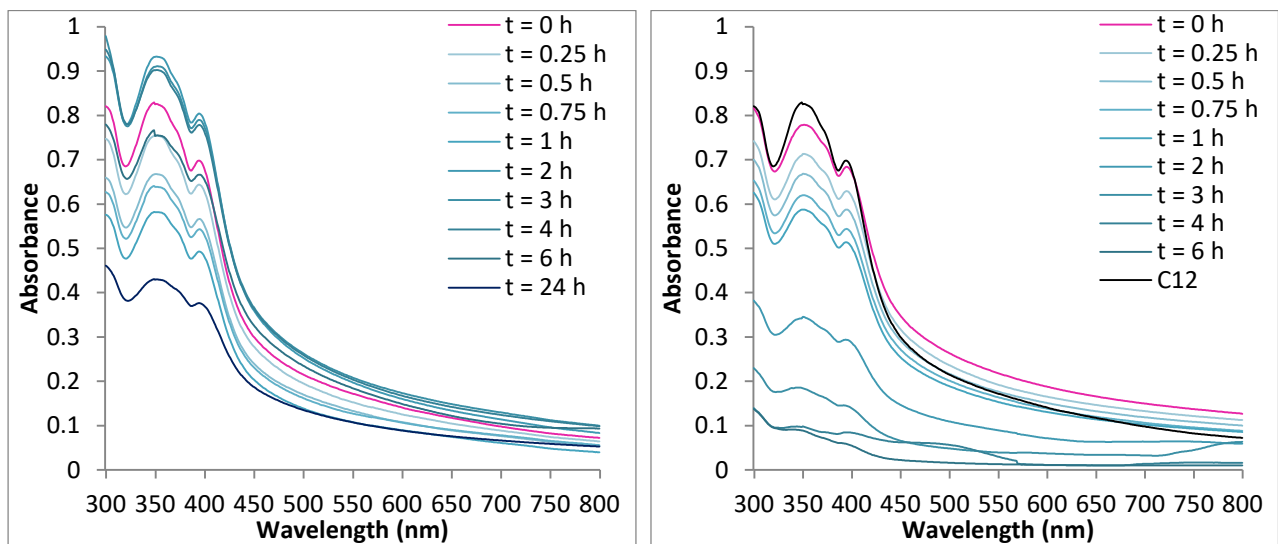

**Figure S60:** UV-Visible spectra of the Au(III) complex **C12** ( $10^{-4}$  M) in PBS (pH 7.4) recorded over time (left); and of **C12** before and after addition of GSH (2 eq.) recorded over time at room temperature (right).

**Table S1.** Antiproliferative activities ( $EC_{50}$  values) of ligands in human SKOV-3, A375, MCF-7, and A549 cells after 72 h incubation.

| Compound | $EC_{50}$ [ $\mu$ M] <sup>1</sup> |             |              |             |
|----------|-----------------------------------|-------------|--------------|-------------|
|          | SKOV-3<br>(++)                    | A375<br>(+) | MCF7<br>(++) | A549<br>(+) |
| L1       | >80                               | >80         | >80          | >80         |
| L2       | >80                               | n.d.        | >80          | >80         |
| L3       | 38 $\pm$ 12                       | 18 $\pm$ 2  | 44 $\pm$ 1   | 44 $\pm$ 3  |
| L4       | 45 $\pm$ 3                        | 53 $\pm$ 4  | 55 $\pm$ 3   | 61 $\pm$ 5  |
| L5       | >80 (n=1)                         | >80 (n=1)   | 31 (n=1)     | >80 (n=1)   |
| L6       | 36 (n=1)                          | 26 $\pm$ 3  | 38 (n=1)     | 36 (n=2)    |
| L7       | >80 (n=1)                         | 59 (n=1)    | 73 (n=1)     | >80 (n=1)   |
| L8       | >80 (n=1)                         | >80 (n=1)   | >80 (n=1)    | >80 (n=1)   |
| L9       | 60 (n=1)                          | 45 (n=1)    | 55 (n=1)     | 54 (n=1)    |
| L10      | >80                               | >80         | >80          | >80         |
| L11      | >80                               | 20 $\pm$ 2  | 4 $\pm$ 1    | >80         |
| L12      | 52 $\pm$ 21                       | 17 (n=1)    | 23 $\pm$ 2   | 73 $\pm$ 8  |

<sup>1</sup> Values represented as mean ( $\pm$  SEM) of at least three independent experiments (n), unless otherwise stated. n.d.= non determined.

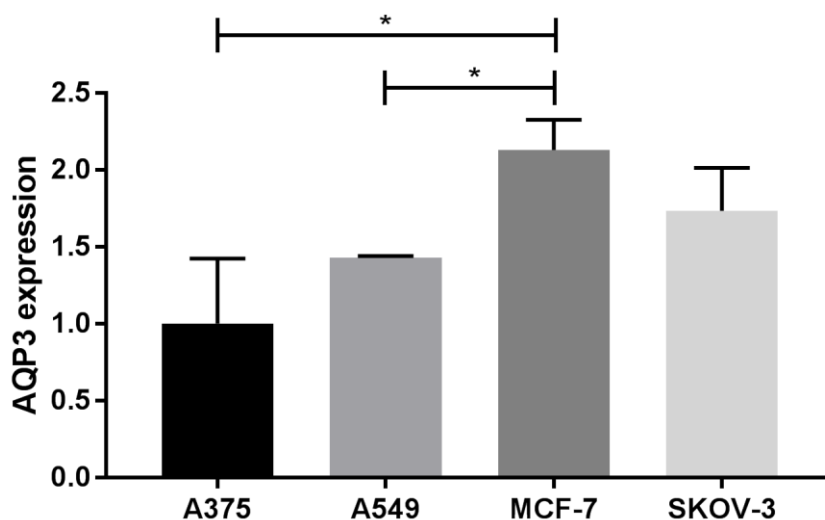**Figure S61.** Normalized mean fluorescence intensity (MFI) of AQP3, detected using a secondary Alexa Fluor®488-labelled antibody. Results were normalized for the sample with the lowest expression (A375) and results are expressed as mean  $\pm$  SEM of three independent experiments. \*p < 0.03.

2018ncs0304

Submitted by: **Prof Casini**Solved by: **Wim T Klooster**Sample ID: **C6**

## Crystal Data and Experimental

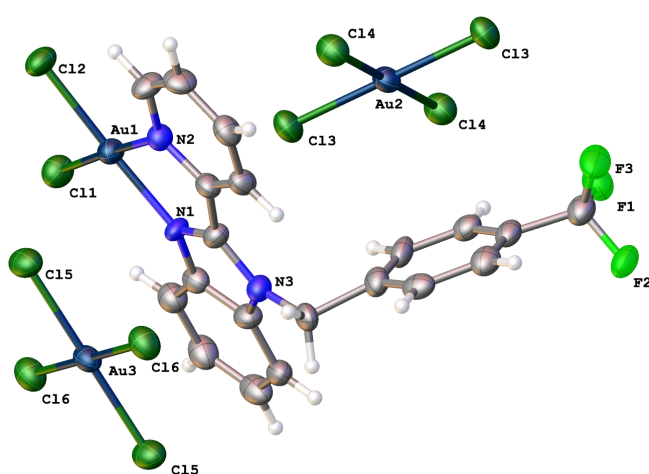

**Figure S62:** Thermal ellipsoids drawn at the 50% probability level.

**Experimental.** A suitable yellow block-shaped crystals of **2018ncs0304** ( $0.050 \times 0.040 \times 0.030$ ) mm<sup>3</sup> was selected and mounted on a MITIGEN holder in perfluoroether oil on a Rigaku 007HF diffractometer equipped with Varimax confocal mirrors and an AFC11 goniometer and HyPix 6000HE detector. The crystal was kept at  $T = 100.00(10)$  K during data collection. Using **Olex2** (Dolomanov et al., 2009), the structure was solved with the **ShelXT** (Sheldrick, 2015) structure solution program, using the Intrinsic Phasing solution method. The model was refined with version 2014/7 of **ShelXL** (Sheldrick, 2015) using Least Squares minimisation.

**Crystal Data.** C<sub>20</sub>H<sub>14</sub>Au<sub>2</sub>Cl<sub>6</sub>F<sub>3</sub>N<sub>3</sub>,  $M_r = 959.97$ , triclinic, P-1 (No. 2),  $a = 9.1341(3)$  Å,  $b = 9.2310(3)$  Å,  $c = 16.4226(5)$  Å,  $\alpha = 78.730(3)^\circ$ ,  $\beta = 86.795(2)^\circ$ ,  $\gamma = 71.093(3)^\circ$ ,  $V = 1284.69(8)$  Å<sup>3</sup>,  $T = 100(2)$  K,  $Z = 2$ ,  $Z' = 1$ ,  $\mu(\text{CuK}\alpha) = 27.253$  mm<sup>-1</sup>, 23132 reflections measured, 4640 unique ( $R_{\text{int}} = 0.0720$ ) which were used in all calculations. The final  $wR_2$  was 0.1431 (all data) and  $R_1$  was 0.0504 ( $I > 2(I)$ ).

| Compound                              | 2018ncs0304                                                                                   |
|---------------------------------------|-----------------------------------------------------------------------------------------------|
| Formula                               | C <sub>20</sub> H <sub>14</sub> Au <sub>2</sub> Cl <sub>6</sub> F <sub>3</sub> N <sub>3</sub> |
| $D_{\text{calc.}} / \text{g cm}^{-3}$ | 2.482                                                                                         |
| $\mu / \text{mm}^{-1}$                | 27.253                                                                                        |
| Formula Weight                        | 959.97                                                                                        |
| Colour                                | yellow                                                                                        |
| Shape                                 | block                                                                                         |
| Size/mm <sup>3</sup>                  | $0.050 \times 0.040 \times 0.030$                                                             |
| $T/\text{K}$                          | 100(2)                                                                                        |
| Crystal System                        | triclinic                                                                                     |
| Space Group                           | P-1                                                                                           |
| $a/\text{\AA}$                        | 9.1341(3)                                                                                     |
| $b/\text{\AA}$                        | 9.2310(3)                                                                                     |
| $c/\text{\AA}$                        | 16.4226(5)                                                                                    |
| $\alpha/^\circ$                       | 78.730(3)                                                                                     |
| $\beta/^\circ$                        | 86.795(2)                                                                                     |
| $\gamma/^\circ$                       | 71.093(3)                                                                                     |
| $V/\text{\AA}^3$                      | 1284.69(8)                                                                                    |
| $Z$                                   | 2                                                                                             |
| $Z'$                                  | 1                                                                                             |
| Wavelength/Å                          | 1.54184                                                                                       |
| Radiation type                        | CuK $\alpha$                                                                                  |
| $\theta_{\text{min}}/^\circ$          | 2.744                                                                                         |
| $\theta_{\text{max}}/^\circ$          | 68.244                                                                                        |
| Measured Refl.                        | 23132                                                                                         |
| Independent Refl.                     | 4640                                                                                          |
| Reflections Used                      | 4211                                                                                          |
| $R_{\text{int}}$                      | 0.0720                                                                                        |
| Parameters                            | 310                                                                                           |
| Restraints                            | 0                                                                                             |
| Largest Peak                          | 3.059                                                                                         |
| Deepest Hole                          | -2.835                                                                                        |
| GooF                                  | 1.058                                                                                         |
| $wR_2$ (all data)                     | 0.1431                                                                                        |
| $wR_2$                                | 0.1400                                                                                        |
| $R_1$ (all data)                      | 0.0543                                                                                        |
| $R_1$                                 | 0.0504                                                                                        |

## Structure Quality Indicators

|                     |                 |                  |                        |                     |
|---------------------|-----------------|------------------|------------------------|---------------------|
| <b>Reflections:</b> | d min (Cu) 0.83 | I/ $\sigma$ 24.5 | R <sub>int</sub> 7.20% | complete 99% (IUCr) |
| <b>Refinement:</b>  | Shift -0.001    | Max Peak 3.1     | Min Peak -2.8          | Goof 1.058          |

A yellow block-shaped crystal with dimensions 0.050×0.040×0.030 mm<sup>3</sup> was mounted on a MITIGEN holder in perfluoroether oil. X-ray diffraction data were collected using a Rigaku 007HF diffractometer equipped with Varimax confocal mirrors and an AFC11 goniometer and HyPix 6000HE detector, and equipped with an Oxford Cryosystems low-temperature device, operating at  $T = 100.00(10)$  K.

Data were measured using  $\omega$  scans of 0.5 ° per frame for 0.5 s using CuK $\alpha$  radiation (Rotating-anode X-ray tube, 40 kV, 30 mA). The total number of runs and images was based on the strategy calculation from the program **CrysAlisPro** (Rigaku, V1.171.39.46, 2018). The maximum resolution achieved was  $\Theta = 68.244^\circ$ .

Cell parameters were retrieved using the **CrysAlisPro** (Rigaku, V1.171.39.46, 2018) software and refined using **CrysAlisPro** (Rigaku, V1.171.39.46, 2018) on 10414 reflections, 45 % of the observed reflections.

Data reduction was performed using the **CrysAlisPro** (Rigaku, V1.171.39.46, 2018) software which corrects for Lorentz polarisation. The final completeness is 99.20 % out to 68.244° in  $\Theta$ .

A multi-scan absorption correction was performed using CrysAlisPro 1.171.39.46 (Rigaku Oxford Diffraction, 2018) Empirical absorption correction using spherical harmonics, implemented in SCALE3 ABSPACK scaling algorithm. The absorption coefficient  $\mu$  of this material is 27.253 mm<sup>-1</sup> at this wavelength ( $\lambda = 1.54184\text{\AA}$ ) and the minimum and maximum transmissions are 0.12468 and 1.00000.

The structure was solved in the space group P-1 (# 2) by Intrinsic Phasing using the **ShelXT** (Sheldrick, 2015) structure solution program and refined by Least Squares using version 2014/7 of **ShelXL** (Sheldrick, 2015). All non-hydrogen atoms were refined anisotropically. Hydrogen atom positions were calculated geometrically and refined using the riding model.

There is a single molecule in the asymmetric unit, which is represented by the reported sum formula. In other words: Z is 2 and Z' is 1.

There is also an AuCl<sub>4</sub><sup>-</sup> molecule present, with two Au atoms at special positions.

There is room for a small solvent molecule, which could possibly be a (partial) MeOH, but could not be refined as such. The structure has been SQUEEZED instead.

## Reflection Statistics

|                                     |                                                             |                            |                 |
|-------------------------------------|-------------------------------------------------------------|----------------------------|-----------------|
| Total reflections (after filtering) | 23132                                                       | Unique reflections         | 4640            |
| Completeness                        | 0.991                                                       | Mean $I/\sigma$            | 18.3            |
| $hkl_{\max}$ collected              | (10, 10, 19)                                                | $hkl_{\min}$ collected     | (-10, -10, -19) |
| $hkl_{\max}$ used                   | (10, 10, 19)                                                | $hkl_{\min}$ used          | (-10, -10, 0)   |
| Lim $d_{\max}$ collected            | 100.0                                                       | Lim $d_{\min}$ collected   | 0.77            |
| $d_{\max}$ used                     | 16.11                                                       | $d_{\min}$ used            | 0.83            |
| Friedel pairs                       | 2655                                                        | Friedel pairs merged       | 1               |
| Inconsistent equivalents            | 2                                                           | $R_{\text{int}}$           | 0.072           |
| $R_{\text{sigma}}$                  | 0.0409                                                      | Intensity transformed      | 0               |
| Omitted reflections                 | 0                                                           | Omitted by user (OMIT hkl) | 0               |
| Multiplicity                        | (1548, 1951, 1350, 868, 538, 414, 305, 161, 74, 61, 13, 12) | Maximum multiplicity       | 16              |
| Removed systematic absences         | 0                                                           | Filtered off (Shel/OMIT)   | 0               |



**Table 1:** Fractional Atomic Coordinates ( $\times 10^4$ ) and Equivalent Isotropic Displacement Parameters ( $\text{\AA}^2 \times 10^3$ ) for **2018ncs0304**.  $U_{eq}$  is defined as 1/3 of the trace of the orthogonalised  $U_{ij}$ .

| Atom | x         | y         | z          | $U_{eq}$  |
|------|-----------|-----------|------------|-----------|
| Au01 | 5000      | 5000      | 5000       | 32.18(17) |
| Au02 | 2037.3(4) | 7104.8(4) | 7836.5(2)  | 31.28(16) |
| Au03 | 5000      | 5000      | 10000      | 35.20(18) |
| Cl04 | 3566(3)   | 4849(3)   | 6181.0(13) | 40.9(5)   |
| Cl05 | 6992(3)   | 5863(3)   | 9468.3(14) | 45.2(5)   |
| Cl06 | 5232(3)   | 7292(2)   | 5208.3(13) | 42.2(5)   |
| Cl07 | 195(3)    | 9452(3)   | 7553.4(15) | 43.3(5)   |
| Cl08 | 3284(3)   | 7423(3)   | 9598.5(15) | 46.6(5)   |
| Cl09 | 154(3)    | 6131(3)   | 8378.5(15) | 42.5(5)   |
| F00A | 11945(6)  | 870(6)    | 4901(4)    | 46.0(13)  |
| F00B | 9696(7)   | 1494(7)   | 4337(3)    | 51.1(13)  |
| F00C | 10868(7)  | 3197(6)   | 4224(4)    | 53.4(15)  |
| N00D | 3821(8)   | 5114(7)   | 8048(4)    | 29.6(14)  |
| N00E | 6361(8)   | 3909(8)   | 7985(4)    | 32.7(15)  |
| N00F | 3801(8)   | 7908(8)   | 7377(4)    | 31.4(14)  |
| C00G | 5207(9)   | 5273(9)   | 7833(5)    | 30.4(16)  |
| C00H | 3632(11)  | 9404(9)   | 7021(6)    | 37.4(19)  |
| C00I | 4058(10)  | 3538(9)   | 8343(5)    | 32.3(17)  |
| C00J | 5270(10)  | 6827(9)   | 7460(5)    | 31.6(17)  |
| C00K | 8412(10)  | 2324(9)   | 5781(5)    | 34.3(18)  |
| C00L | 6364(11)  | 8811(10)  | 6863(5)    | 36.1(18)  |
| C00M | 6297(11)  | 1151(10)  | 8557(5)    | 36.6(19)  |
| C00N | 10589(11) | 2015(10)  | 4754(6)    | 40(2)     |
| C00O | 9848(10)  | 2494(9)   | 5543(5)    | 35.6(18)  |
| C00P | 8018(11)  | 3538(10)  | 7911(5)    | 36.1(19)  |
| C00Q | 8570(11)  | 3260(9)   | 7030(6)    | 35.4(18)  |
| C00R | 5632(11)  | 2781(9)   | 8292(5)    | 35.9(18)  |
| C00S | 10644(12) | 3072(10)  | 6016(6)    | 40(2)     |
| C00T | 3053(12)  | 2711(10)  | 8652(5)    | 39.4(19)  |
| C00U | 10016(11) | 3461(9)   | 6780(6)    | 37(2)     |
| C00V | 4880(11)  | 9889(10)  | 6760(5)    | 40(2)     |
| C00W | 7825(10)  | 2728(9)   | 6517(6)    | 36.7(19)  |
| C00X | 5306(13)  | 363(10)   | 8856(6)    | 45(2)     |
| C00Y | 6541(10)  | 7261(10)  | 7196(5)    | 32.4(17)  |
| C00Z | 3678(12)  | 1118(10)  | 8900(5)    | 44(2)     |

**Table 2:** Anisotropic Displacement Parameters ( $\times 10^4$ )

**2018ncs0304.** The anisotropic displacement factor exponent takes the form:  $-2\pi^2[h^2a^{*2} \times U_{11} + \dots + 2hka^* \times b^* \times U_{12}]$

| Atom | $U_{11}$ | $U_{22}$ | $U_{33}$ | $U_{23}$  | $U_{13}$ | $U_{12}$  |
|------|----------|----------|----------|-----------|----------|-----------|
| Au01 | 38.1(3)  | 31.2(3)  | 26.9(3)  | -2.84(19) | 0.0(2)   | -12.0(2)  |
| Au02 | 32.5(2)  | 26.6(2)  | 31.6(2)  | -2.73(15) | 0.82(15) | -6.98(16) |
| Au03 | 50.2(3)  | 28.1(3)  | 26.6(3)  | -3.45(19) | 1.5(2)   | -12.7(2)  |
| Cl04 | 46.7(12) | 48.6(12) | 30.6(10) | -8.4(8)   | 6.0(8)   | -20.0(10) |
| Cl05 | 59.6(15) | 42.3(12) | 38.1(11) | -9.0(9)   | 6.4(10)  | -22.5(11) |
| Cl06 | 53.2(13) | 37.2(10) | 40.2(11) | -7.1(8)   | 0.7(9)   | -20.0(9)  |
| Cl07 | 36.8(11) | 31.3(11) | 51.3(13) | -0.9(9)   | 2.8(9)   | -1.1(8)   |
| Cl08 | 61.7(15) | 30.7(10) | 42.7(12) | -4.9(9)   | -5.0(10) | -8.9(10)  |
| Cl09 | 39.0(12) | 39.2(11) | 49.7(12) | -6.2(9)   | 4.4(9)   | -15.1(9)  |
| F00A | 40(3)    | 33(3)    | 53(3)    | -5(2)     | 13(2)    | 0(2)      |
| F00B | 64(4)    | 49(3)    | 40(3)    | -10(2)    | 9(3)     | -17(3)    |
| F00C | 63(4)    | 36(3)    | 50(3)    | 4(2)      | 22(3)    | -11(3)    |
| N00D | 26(3)    | 21(3)    | 32(3)    | 1(3)      | 4(3)     | 2(3)      |
| N00E | 34(4)    | 26(3)    | 32(4)    | -4(3)     | 6(3)     | -4(3)     |
| N00F | 33(4)    | 28(3)    | 30(3)    | -4(3)     | 4(3)     | -8(3)     |
| C00G | 31(4)    | 25(4)    | 31(4)    | -6(3)     | -2(3)    | -4(3)     |
| C00H | 38(5)    | 20(4)    | 47(5)    | 0(3)      | -1(4)    | -4(3)     |
| C00I | 45(5)    | 25(4)    | 28(4)    | -6(3)     | 0(3)     | -11(3)    |
| C00J | 42(5)    | 26(4)    | 24(4)    | -2(3)     | 4(3)     | -9(3)     |
| C00K | 35(4)    | 24(4)    | 40(4)    | -5(3)     | -3(4)    | -4(3)     |
| C00L | 44(5)    | 38(4)    | 31(4)    | -7(3)     | 8(4)     | -20(4)    |
| C00M | 45(5)    | 29(4)    | 28(4)    | -6(3)     | 0(4)     | -2(4)     |
| C00N | 44(5)    | 27(4)    | 45(5)    | -5(4)     | 7(4)     | -6(4)     |
| C00O | 37(5)    | 22(4)    | 39(5)    | -1(3)     | 7(4)     | -2(3)     |
| C00P | 49(5)    | 31(4)    | 25(4)    | -11(3)    | 4(4)     | -5(4)     |
| C00Q | 41(5)    | 25(4)    | 37(4)    | -9(3)     | 8(4)     | -6(4)     |
| C00R | 46(5)    | 25(4)    | 31(4)    | -1(3)     | -1(4)    | -6(4)     |
| C00S | 44(5)    | 27(4)    | 45(5)    | -2(4)     | 6(4)     | -10(4)    |
| C00T | 50(5)    | 33(4)    | 36(4)    | -6(3)     | 4(4)     | -15(4)    |
| C00U | 46(5)    | 21(4)    | 41(5)    | -4(3)     | -9(4)    | -8(4)     |
| C00V | 54(6)    | 27(4)    | 35(5)    | 6(3)      | -1(4)    | -15(4)    |
| C00W | 35(5)    | 23(4)    | 44(5)    | -5(3)     | 18(4)    | -3(3)     |
| C00X | 72(7)    | 29(4)    | 35(4)    | -5(3)     | 2(4)     | -18(4)    |
| C00Y | 30(4)    | 35(4)    | 29(4)    | -1(3)     | 2(3)     | -10(3)    |
| C00Z | 62(7)    | 35(5)    | 40(5)    | -9(4)     | 12(5)    | -23(5)    |

**Table 3:** Bond Lengths in Å for **2018ncs0304**.

| Atom | Atom              | Length/Å  |
|------|-------------------|-----------|
| Au01 | Cl04              | 2.286(2)  |
| Au01 | Cl04 <sup>1</sup> | 2.286(2)  |
| Au01 | Cl06 <sup>1</sup> | 2.285(2)  |
| Au01 | Cl06              | 2.285(2)  |
| Au02 | Cl07              | 2.252(2)  |
| Au02 | Cl09              | 2.253(2)  |
| Au02 | N00D              | 2.006(6)  |
| Au02 | N00F              | 2.034(7)  |
| Au03 | Cl05              | 2.279(2)  |
| Au03 | Cl05 <sup>2</sup> | 2.279(2)  |
| Au03 | Cl08              | 2.272(2)  |
| Au03 | Cl08 <sup>2</sup> | 2.272(2)  |
| F00A | C00N              | 1.340(10) |
| F00B | C00N              | 1.347(11) |
| F00C | C00N              | 1.340(10) |
| N00D | C00G              | 1.342(11) |
| N00D | C00I              | 1.389(10) |
| N00E | C00G              | 1.344(10) |
| N00E | C00P              | 1.444(12) |
| N00E | C00R              | 1.409(11) |
| N00F | C00H              | 1.352(11) |
| N00F | C00J              | 1.383(11) |

| Atom | Atom | Length/Å  |
|------|------|-----------|
| C00G | C00J | 1.463(11) |
| C00H | C00V | 1.372(13) |
| C00I | C00R | 1.386(13) |
| C00I | C00T | 1.391(12) |
| C00J | C00Y | 1.370(12) |
| C00K | C00O | 1.397(12) |
| C00K | C00W | 1.365(12) |
| C00L | C00V | 1.394(13) |
| C00L | C00Y | 1.388(12) |
| C00M | C00R | 1.416(11) |
| C00M | C00X | 1.353(14) |
| C00N | C00O | 1.505(12) |
| C00O | C00S | 1.376(13) |
| C00P | C00Q | 1.546(11) |
| C00Q | C00U | 1.420(13) |
| C00Q | C00W | 1.363(13) |
| C00S | C00U | 1.412(13) |
| C00T | C00Z | 1.379(12) |
| C00X | C00Z | 1.427(14) |

----

<sup>1</sup>1-x,1-y,1-z; <sup>2</sup>1-x,1-y,2-z**Table 4:** Bond Angles in ° for **2018ncs0304**.

| Atom              | Atom | Atom              | Angle/°    |
|-------------------|------|-------------------|------------|
| Cl04              | Au01 | Cl04 <sup>1</sup> | 180.0      |
| Cl06 <sup>1</sup> | Au01 | Cl04 <sup>1</sup> | 90.30(8)   |
| Cl06 <sup>1</sup> | Au01 | Cl04              | 89.70(8)   |
| Cl06              | Au01 | Cl04              | 90.30(8)   |
| Cl06              | Au01 | Cl04 <sup>1</sup> | 89.71(8)   |
| Cl06              | Au01 | Cl06 <sup>1</sup> | 180.0      |
| Cl07              | Au02 | Cl09              | 87.34(9)   |
| N00D              | Au02 | Cl07              | 174.7(2)   |
| N00D              | Au02 | Cl09              | 97.9(2)    |
| N00D              | Au02 | N00F              | 79.9(3)    |
| N00F              | Au02 | Cl07              | 94.8(2)    |
| N00F              | Au02 | Cl09              | 177.6(2)   |
| Cl05              | Au03 | Cl05 <sup>2</sup> | 180.0      |
| Cl08              | Au03 | Cl05              | 90.62(9)   |
| Cl08 <sup>2</sup> | Au03 | Cl05              | 89.38(9)   |
| Cl08 <sup>2</sup> | Au03 | Cl05 <sup>2</sup> | 90.62(9)   |
| Cl08              | Au03 | Cl05 <sup>2</sup> | 89.38(9)   |
| Cl08 <sup>2</sup> | Au03 | Cl08              | 180.00(13) |
| C00G              | N00D | Au02              | 114.7(5)   |
| C00G              | N00D | C00I              | 107.2(6)   |
| C00I              | N00D | Au02              | 138.1(6)   |
| C00G              | N00E | C00P              | 131.6(7)   |
| C00G              | N00E | C00R              | 105.2(7)   |
| C00R              | N00E | C00P              | 123.1(7)   |
| C00H              | N00F | Au02              | 124.7(6)   |
| C00H              | N00F | C00J              | 119.1(7)   |
| C00J              | N00F | Au02              | 116.2(5)   |
| N00D              | C00G | N00E              | 112.4(7)   |
| N00D              | C00G | C00J              | 118.2(7)   |
| N00E              | C00G | C00J              | 129.4(8)   |
| N00F              | C00H | C00V              | 121.8(8)   |
| N00D              | C00I | C00T              | 132.3(8)   |
| C00R              | C00I | N00D              | 106.8(7)   |

| Atom | Atom | Atom | Angle/°  |
|------|------|------|----------|
| C00R | C00I | C00T | 120.9(8) |
| N00F | C00J | C00G | 110.9(7) |
| C00Y | C00J | N00F | 120.7(7) |
| C00Y | C00J | C00G | 128.3(8) |
| C00W | C00K | C00O | 117.4(8) |
| C00Y | C00L | C00V | 119.2(8) |
| C00X | C00M | C00R | 116.2(9) |
| F00A | C00N | F00B | 106.8(7) |
| F00A | C00N | F00C | 106.9(7) |
| F00A | C00N | C00O | 111.8(8) |
| F00B | C00N | C00O | 112.4(8) |
| F00C | C00N | C00O | 106.1(8) |
| F00C | C00N | C00O | 112.4(7) |
| C00K | C00O | C00N | 120.2(8) |
| C00S | C00O | C00K | 122.1(8) |
| C00S | C00O | C00N | 117.7(8) |
| N00E | C00P | C00Q | 111.6(7) |
| C00U | C00Q | C00P | 116.6(8) |
| C00W | C00Q | C00P | 124.4(8) |
| C00W | C00Q | C00U | 118.8(8) |
| N00E | C00R | C00M | 129.3(8) |
| C00I | C00R | N00E | 108.3(7) |
| C00I | C00R | C00M | 122.3(8) |
| C00O | C00S | C00U | 119.2(9) |
| C00Z | C00T | C00I | 117.6(9) |
| C00S | C00U | C00Q | 118.7(8) |
| C00H | C00V | C00L | 119.2(8) |
| C00Q | C00W | C00K | 123.7(8) |
| C00M | C00X | C00Z | 122.3(8) |
| C00J | C00Y | C00L | 119.8(8) |
| C00T | C00Z | C00X | 120.7(9) |

----

<sup>1</sup>1-x,1-y,1-z; <sup>2</sup>1-x,1-y,2-z

**Table 5:** Torsion Angles in ° for 2018ncs0304.

| Atom | Atom | Atom | Atom | Angle/°   |
|------|------|------|------|-----------|
| Au02 | N00D | C00G | N00E | -179.9(5) |
| Au02 | N00D | C00G | C00J | -1.4(9)   |
| Au02 | N00D | C00I | C00R | 177.6(6)  |
| Au02 | N00D | C00I | C00T | -2.8(15)  |
| Au02 | N00F | C00H | C00V | 176.6(7)  |
| Au02 | N00F | C00J | C00G | 3.2(8)    |
| Au02 | N00F | C00J | C00Y | -177.8(6) |
| F00A | C00N | C00O | C00K | -118.1(8) |
| F00A | C00N | C00O | C00S | 60.9(10)  |
| F00B | C00N | C00O | C00K | 2.0(11)   |
| F00B | C00N | C00O | C00S | -179.0(7) |
| F00C | C00N | C00O | C00K | 121.6(9)  |
| F00C | C00N | C00O | C00S | -59.4(11) |
| N00D | C00G | C00J | N00F | -1.2(10)  |
| N00D | C00G | C00J | C00Y | 179.9(8)  |
| N00D | C00I | C00R | N00E | 1.6(9)    |
| N00D | C00I | C00R | C00M | 178.9(7)  |
| N00D | C00I | C00T | C00Z | -179.9(8) |
| N00E | C00G | C00J | N00F | 176.9(8)  |
| N00E | C00G | C00J | C00Y | -1.9(14)  |
| N00E | C00P | C00Q | C00U | 157.3(7)  |
| N00E | C00P | C00Q | C00W | -27.9(11) |
| N00F | C00H | C00V | C00L | 0.1(14)   |
| N00F | C00J | C00Y | C00L | 1.9(12)   |
| C00G | N00D | C00I | C00R | -0.1(9)   |
| C00G | N00D | C00I | C00T | 179.5(9)  |
| C00G | N00E | C00P | C00Q | -88.2(10) |
| C00G | N00E | C00R | C00I | -2.4(9)   |
| C00G | N00E | C00R | C00M | -179.5(8) |
| C00G | C00J | C00Y | C00L | -179.3(8) |
| C00H | N00F | C00J | C00G | -178.2(7) |
| C00H | N00F | C00J | C00Y | 0.8(12)   |
| C00I | N00D | C00G | N00E | -1.6(9)   |
| C00I | N00D | C00G | C00J | 176.9(7)  |
| C00I | C00T | C00Z | C00X | 1.4(13)   |
| C00J | N00F | C00H | C00V | -1.8(13)  |
| C00K | C00O | C00S | C00U | 2.1(12)   |
| C00M | C00X | C00Z | C00T | -1.6(14)  |
| C00N | C00O | C00S | C00U | -176.9(8) |
| C00O | C00K | C00W | C00Q | -1.0(12)  |
| C00O | C00S | C00U | C00Q | -0.8(12)  |
| C00P | N00E | C00G | N00D | -175.1(8) |
| C00P | N00E | C00G | C00J | 6.7(14)   |
| C00P | N00E | C00R | C00I | 175.4(7)  |
| C00P | N00E | C00R | C00M | -1.7(13)  |
| C00P | C00Q | C00U | C00S | 173.8(7)  |
| C00P | C00Q | C00W | C00K | -172.5(8) |
| C00R | N00E | C00G | N00D | 2.5(9)    |
| C00R | N00E | C00G | C00J | -175.8(8) |
| C00R | N00E | C00P | C00Q | 94.6(9)   |
| C00R | C00I | C00T | C00Z | -0.3(12)  |
| C00R | C00M | C00X | C00Z | 0.5(13)   |
| C00T | C00I | C00R | N00E | -178.1(7) |
| C00T | C00I | C00R | C00M | -0.7(13)  |
| C00U | C00Q | C00W | C00K | 2.2(13)   |
| C00V | C00L | C00Y | C00J | -3.6(13)  |
| C00W | C00K | C00O | C00N | 177.7(8)  |
| C00W | C00K | C00O | C00S | -1.2(12)  |
| C00W | C00Q | C00U | C00S | -1.2(12)  |

| Atom | Atom | Atom | Atom | Angle/°  |
|------|------|------|------|----------|
| C00X | C00M | C00R | N00E | 177.3(9) |
| C00X | C00M | C00R | C00I | 0.6(12)  |
| C00Y | C00L | C00V | C00H | 2.6(13)  |

**Table 6:** Hydrogen Fractional Atomic Coordinates ( $\times 10^4$ ) and Equivalent Isotropic Displacement Parameters ( $\text{\AA}^2 \times 10^3$ ) for **2018ncs0304**.  $U_{eq}$  is defined as 1/3 of the trace of the orthogonalised  $U_{ij}$ .

| Atom | x     | y     | z    | $U_{eq}$ |
|------|-------|-------|------|----------|
| H00H | 2621  | 10140 | 6949 | 45       |
| H00K | 7865  | 1943  | 5443 | 41       |
| H00L | 7244  | 9134  | 6708 | 43       |
| H00M | 7379  | 639   | 8525 | 44       |
| H00A | 8529  | 2590  | 8323 | 43       |
| H00B | 8327  | 4405  | 8036 | 43       |
| H00S | 11603 | 3209  | 5831 | 48       |
| H00T | 1973  | 3226  | 8691 | 47       |
| H00U | 10552 | 3848  | 7121 | 44       |
| H00V | 4733  | 10947 | 6513 | 48       |
| H00W | 6841  | 2632  | 6681 | 44       |
| H00X | 5707  | -733  | 9045 | 54       |
| H00Y | 7542  | 6504  | 7241 | 39       |
| H00Z | 3019  | 518   | 9101 | 53       |

**Table 7:** Solvent masking (Olex2) information for **2018ncs0304**.

| No | x     | y     | z     | V    | e   | Content |
|----|-------|-------|-------|------|-----|---------|
| 1  | 0.000 | 0.000 | 0.000 | 87.7 | 6.0 | ?       |

## Citations

CrysAlisPro Software System, Rigaku Oxford Diffraction, (2018).

O.V. Dolomanov and L.J. Bourhis and R.J. Gildea and J.A.K. Howard and H. Puschmann, Olex2: A complete structure solution, refinement and analysis program, *J. Appl. Cryst.*, (2009), **42**, 339-341.

Sheldrick, G.M., Crystal structure refinement with ShelXL, *Acta Cryst.*, (2015), **C27**, 3-8.

Sheldrick, G.M., ShelXT-Integrated space-group and crystal-structure determination, *Acta Cryst.*, (2015), **A71**, 3-8.

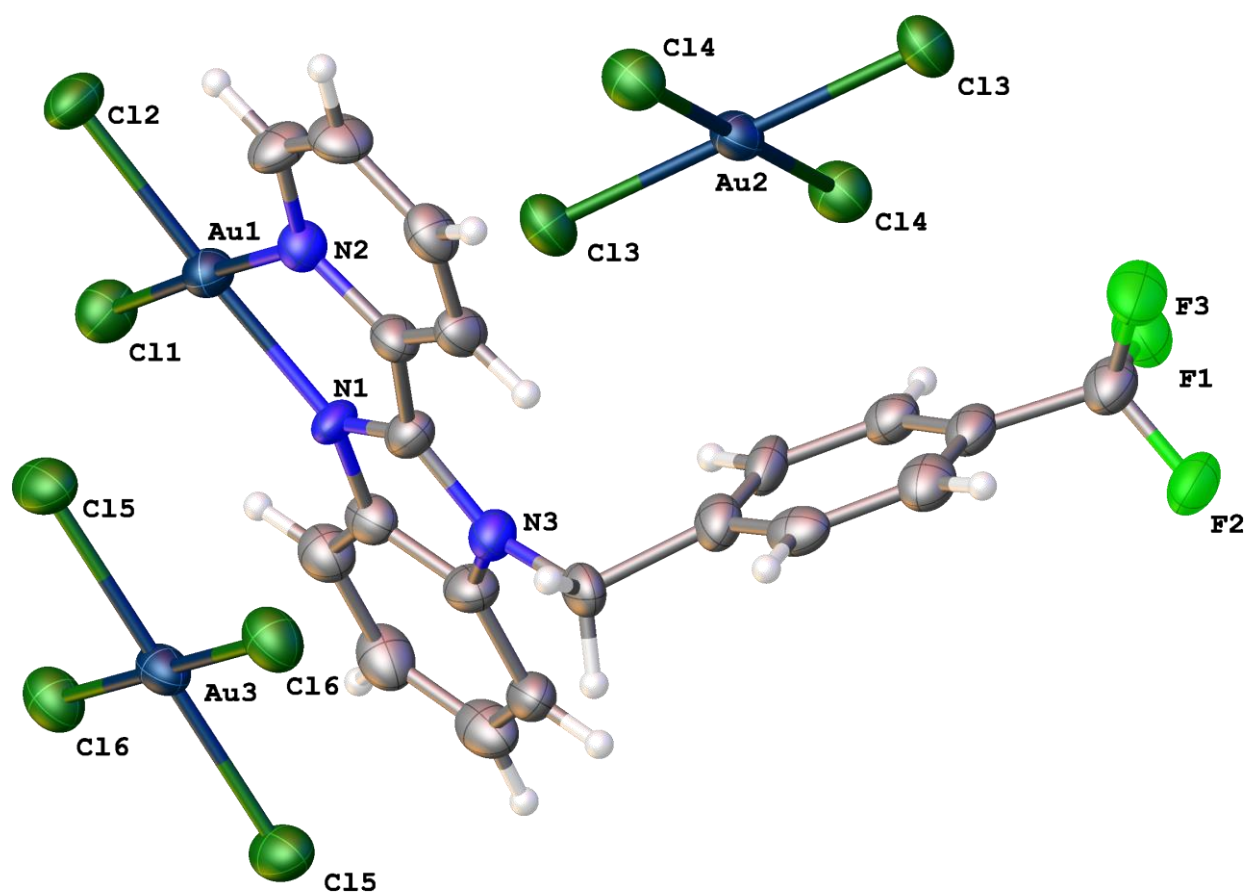

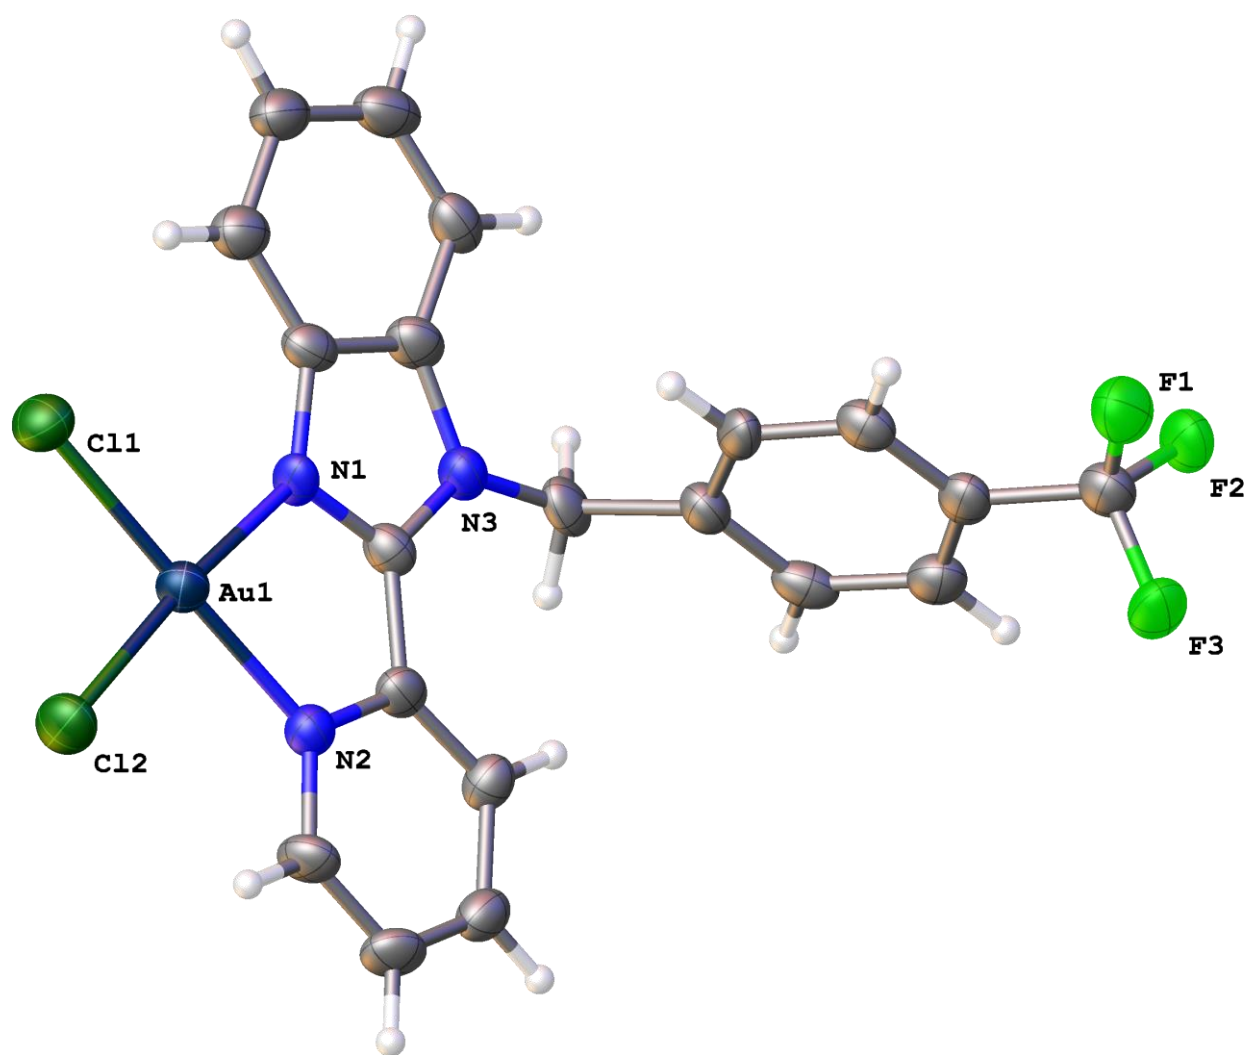

2018ncs0303

 UK National  
Crystallography Service

www.ncs.ac.uk | info@ncs.ac.uk | 023 8059 6722

Submitted by: **Prof Casini**Solved by: **Wim T Klooster**Sample ID: **7**

## Crystal Data and Experimental

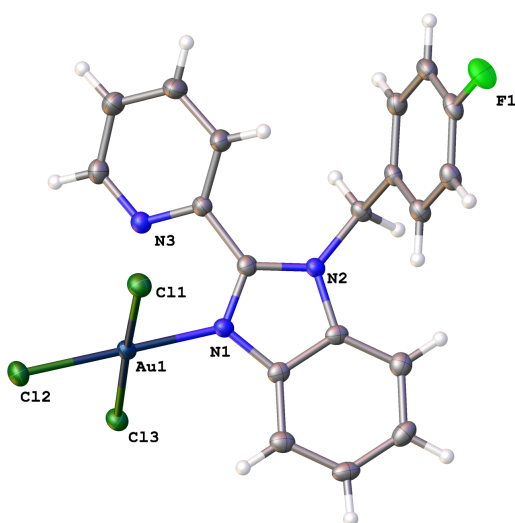

**Figure S63:** Thermal ellipsoids drawn at the 50% probability level.

**Experimental.** A suitable yellow plate-shaped crystal of **2018ncs0303** (0.080×0.050×0.020) mm<sup>3</sup> was selected and mounted on a MITIGEN holder on a Rigaku 007HF diffractometer equipped with Varimax confocal mirrors and an AFC11 goniometer and HyPix 6000HE detector. The crystal was kept at  $T = 100.00(10)$  K during data collection. Using **Olex2** (Dolomanov et al., 2009), the structure was solved with the **ShelXT** (Sheldrick, 2015) structure solution program, using the Intrinsic Phasing solution method. The model was refined with version 2014/7 of **ShelXL** (Sheldrick, 2015) using Least Squares minimisation.

**Crystal Data.** C<sub>19</sub>H<sub>14</sub>AuCl<sub>3</sub>FN<sub>3</sub>,  $M_r = 606.65$ , monoclinic, P2<sub>1</sub>/n (No. 14),  $a = 12.19750(10)$  Å,  $b = 9.77810(10)$  Å,  $c = 17.08670(10)$  Å,  $\beta = 108.9480(10)^\circ$ ,  $\alpha = \gamma = 90^\circ$ ,  $V = 1927.48(3)$  Å<sup>3</sup>,  $T = 100(2)$  K,  $Z = 4$ ,  $Z' = 1$ ,  $\mu(\text{CuK}\alpha) = 18.336$  mm<sup>-1</sup>, 34653 reflections measured, 3523 unique ( $R_{\text{int}} = 0.0329$ ) which were used in all calculations. The final  $wR_2$  was 0.0440 (all data) and  $R_1$  was 0.0167 ( $I > 2(I)$ ).

| Compound                              | 2018ncs0303                                                       |
|---------------------------------------|-------------------------------------------------------------------|
| Formula                               | C <sub>19</sub> H <sub>14</sub> AuCl <sub>3</sub> FN <sub>3</sub> |
| $D_{\text{calc.}} / \text{g cm}^{-3}$ | 2.091                                                             |
| $\mu / \text{mm}^{-1}$                | 18.336                                                            |
| Formula Weight                        | 606.65                                                            |
| Colour                                | yellow                                                            |
| Shape                                 | plate                                                             |
| Size/mm <sup>3</sup>                  | 0.080×0.050×0.020                                                 |
| $T/\text{K}$                          | 100(2)                                                            |
| Crystal System                        | monoclinic                                                        |
| Space Group                           | P2 <sub>1</sub> /n                                                |
| $a/\text{\AA}$                        | 12.19750(10)                                                      |
| $b/\text{\AA}$                        | 9.77810(10)                                                       |
| $c/\text{\AA}$                        | 17.08670(10)                                                      |
| $\alpha/^\circ$                       | 90                                                                |
| $\beta/^\circ$                        | 108.9480(10)                                                      |
| $\gamma/^\circ$                       | 90                                                                |
| $V/\text{\AA}^3$                      | 1927.48(3)                                                        |
| $Z$                                   | 4                                                                 |
| $Z'$                                  | 1                                                                 |
| Wavelength/Å                          | 1.54184                                                           |
| Radiation type                        | CuK $\alpha$                                                      |
| $\theta_{\text{min}}/^\circ$          | 3.919                                                             |
| $\theta_{\text{max}}/^\circ$          | 68.251                                                            |
| Measured Refl.                        | 34653                                                             |
| Independent Refl.                     | 3523                                                              |
| Reflections Used                      | 3499                                                              |
| $R_{\text{int}}$                      | 0.0329                                                            |
| Parameters                            | 244                                                               |
| Restraints                            | 0                                                                 |
| Largest Peak                          | 0.623                                                             |
| Deepest Hole                          | -0.726                                                            |
| GooF                                  | 1.086                                                             |
| $wR_2$ (all data)                     | 0.0440                                                            |
| $wR_2$                                | 0.0439                                                            |
| $R_1$ (all data)                      | 0.0169                                                            |
| $R_1$                                 | 0.0167                                                            |



## Structure Quality Indicators

|                     |                 |                  |                        |                           |
|---------------------|-----------------|------------------|------------------------|---------------------------|
| <b>Reflections:</b> | d min (Cu) 0.83 | I/ $\sigma$ 70.0 | R <sub>int</sub> 3.29% | complete 100% (IUCr) 100% |
| <b>Refinement:</b>  | Shift -0.003    | Max Peak 0.6     | Min Peak -0.7          | Goof 1.086                |

A yellow plate-shaped crystal with dimensions 0.080×0.050×0.020 mm<sup>3</sup> was mounted on a MITIGEN holder. X-ray diffraction data were collected using a Rigaku 007HF diffractometer equipped with Varimax confocal mirrors and an AFC11 goniometer and HyPix 6000HE detector, and equipped with an Oxford Cryosystems low-temperature device, operating at  $T = 100.00(10)$  K.

Data were measured using  $\omega$  scans of 0.5 ° per frame for 1.0 s using CuK $\alpha$  radiation (Rotating-anode X-ray tube, 40 kV, 30 mA). The total number of runs and images was based on the strategy calculation from the program **CrysAlisPro** (Rigaku, V1.171.39.46, 2018). The maximum resolution achieved was  $\Theta = 68.251^\circ$ .

Cell parameters were retrieved using the **CrysAlisPro** (Rigaku, V1.171.39.46, 2018) software and refined using **CrysAlisPro** (Rigaku, V1.171.39.46, 2018) on 26320 reflections, 76 % of the observed reflections.

Data reduction was performed using the **CrysAlisPro** (Rigaku, V1.171.39.46, 2018) software which corrects for Lorentz polarisation. The final completeness is 99.90 % out to 68.251° in  $\Theta$ .

A multi-scan absorption correction was performed using CrysAlisPro 1.171.39.46 (Rigaku Oxford Diffraction, 2018) Empirical absorption correction using spherical harmonics, implemented in SCALE3 ABSPACK scaling algorithm. The absorption coefficient  $\mu$  of this material is 18.336 mm<sup>-1</sup> at this wavelength ( $\lambda = 1.54184\text{\AA}$ ) and the minimum and maximum transmissions are 0.44132 and 1.00000.

The structure was solved in the space group P2<sub>1</sub>/n (# 14) by Intrinsic Phasing using the **ShelXT** (Sheldrick, 2015) structure solution program and refined by Least Squares using version 2014/7 of **ShelXL** (Sheldrick, 2015). All non-hydrogen atoms were refined anisotropically. Hydrogen atom positions were calculated geometrically and refined using the riding model.

There is a single molecule in the asymmetric unit, which is represented by the reported sum formula. In other words: Z is 4 and Z' is 1.

## Reflection Statistics

|                                     |                                                          |                                |                 |
|-------------------------------------|----------------------------------------------------------|--------------------------------|-----------------|
| Total reflections (after filtering) | 35917                                                    | Unique reflections             | 3523            |
| Completeness                        | 0.999                                                    | Mean I/ $\sigma$               | 54.85           |
| hkl <sub>max</sub> collected        | (14, 11, 20)                                             | hkl <sub>min</sub> collected   | (-14, -11, -20) |
| hkl <sub>max</sub> used             | (13, 11, 20)                                             | hkl <sub>min</sub> used        | (-14, 0, 0)     |
| Lim d <sub>max</sub> collected      | 100.0                                                    | Lim d <sub>min</sub> collected | 0.77            |
| d <sub>max</sub> used               | 16.16                                                    | d <sub>min</sub> used          | 0.83            |
| Friedel pairs                       | 4978                                                     | Friedel pairs merged           | 1               |
| Inconsistent equivalents            | 0                                                        | R <sub>int</sub>               | 0.0329          |
| R <sub>sigma</sub>                  | 0.0143                                                   | Intensity transformed          | 0               |
| Omitted reflections                 | 0                                                        | Omitted by user (OMIT hkl)     | 0               |
| Multiplicity                        | (2807, 3248, 2021, 1524, 1076, 592, 414, 170, 79, 51, 4) | Maximum multiplicity           | 26              |
| Removed systematic absences         | 1264                                                     | Filtered off (Shel/OMIT)       | 0               |

**Table 1:** Fractional Atomic Coordinates ( $\times 10^4$ ) and Equivalent Isotropic Displacement Parameters ( $\text{\AA}^2 \times 10^3$ ) for **2018ncs0303**.  $U_{eq}$  is defined as  $1/3$  of the trace of the orthogonalised  $U_{ij}$ .

| Atom | x          | y          | z          | $U_{eq}$  |
|------|------------|------------|------------|-----------|
| Au1  | 7564.7(2)  | 1459.3(2)  | 5627.6(2)  | 17.11(5)  |
| Cl1  | 8834.0(6)  | 1625.2(7)  | 4903.3(4)  | 23.57(14) |
| Cl2  | 8494.3(6)  | -466.6(6)  | 6241.8(4)  | 24.44(14) |
| Cl3  | 6216.1(6)  | 1236.9(7)  | 6290.3(4)  | 22.30(13) |
| F1   | 8554.0(16) | 8147.3(18) | 2035.5(11) | 32.6(4)   |
| N1   | 6755.9(19) | 3168(2)    | 5055.3(13) | 17.8(4)   |
| N2   | 6494.9(18) | 5305(2)    | 4616.4(12) | 16.9(4)   |
| N3   | 8589.4(19) | 4009(2)    | 6452.0(13) | 20.5(4)   |
| C1   | 5657(2)    | 3243(3)    | 4465.4(15) | 18.2(5)   |
| C2   | 4822(2)    | 2245(3)    | 4147.2(16) | 22.1(5)   |
| C3   | 3807(2)    | 2665(3)    | 3554.6(16) | 23.5(6)   |
| C4   | 3629(2)    | 4027(3)    | 3290.2(16) | 23.8(6)   |
| C5   | 4461(2)    | 5029(3)    | 3603.2(16) | 21.6(5)   |
| C6   | 5482(2)    | 4602(3)    | 4193.9(15) | 17.8(5)   |
| C7   | 7232(2)    | 4413(3)    | 5134.4(15) | 18.2(5)   |
| C8   | 8367(2)    | 4735(3)    | 5748.1(15) | 18.4(5)   |
| C9   | 9128(2)    | 5680(3)    | 5614.1(17) | 25.2(6)   |
| C10  | 10147(3)   | 5942(3)    | 6254.9(19) | 31.4(7)   |
| C11  | 10367(3)   | 5249(3)    | 6991.1(17) | 27.9(6)   |
| C12  | 9575(2)    | 4279(3)    | 7053.3(17) | 24.0(6)   |
| C13  | 6654(2)    | 6789(3)    | 4524.1(16) | 18.5(5)   |
| C14  | 7165(2)    | 7130(3)    | 3848.8(15) | 17.9(5)   |
| C15  | 6775(3)    | 6491(3)    | 3077.6(17) | 21.0(6)   |
| C16  | 7239(2)    | 6841(3)    | 2463.5(17) | 23.7(6)   |
| C17  | 8094(2)    | 7825(3)    | 2637.1(17) | 22.8(6)   |
| C18  | 8507(3)    | 8470(3)    | 3387.1(18) | 24.4(6)   |
| C19  | 8027(2)    | 8116(3)    | 3996.5(16) | 21.5(5)   |

**Table 2:** Anisotropic Displacement Parameters ( $\times 10^4$ ) **2018ncs0303**. The anisotropic displacement factor exponent takes the form:  $-2\pi^2 [h^2 a^{*2} \times U_{11} + \dots + 2hka^* \times b^* \times U_{12}]$ 

| Atom | $U_{11}$ | $U_{22}$ | $U_{33}$ | $U_{23}$ | $U_{13}$ | $U_{12}$  |
|------|----------|----------|----------|----------|----------|-----------|
| Au1  | 19.58(7) | 16.47(7) | 14.74(7) | 1.17(3)  | 4.82(5)  | -2.22(4)  |
| Cl1  | 25.3(3)  | 25.6(3)  | 22.6(3)  | 1.9(2)   | 11.6(3)  | -0.7(2)   |
| Cl2  | 28.3(3)  | 20.5(3)  | 24.7(3)  | 4.7(2)   | 9.0(3)   | 2.0(2)    |
| Cl3  | 23.8(3)  | 22.8(3)  | 22.0(3)  | 4.2(2)   | 9.7(3)   | -1.5(2)   |
| F1   | 44.0(10) | 32.2(9)  | 30.9(9)  | 6.7(7)   | 24.7(8)  | 1.2(8)    |
| N1   | 19.2(11) | 17.7(10) | 15.9(10) | 0.8(9)   | 4.8(8)   | -3.3(9)   |
| N2   | 18.7(10) | 16.9(10) | 14.8(10) | 1.6(8)   | 5.2(8)   | -1.8(8)   |
| N3   | 21.7(11) | 20.3(11) | 18.6(11) | 2.1(9)   | 5.1(9)   | -1.3(9)   |
| C1   | 19.4(13) | 22.7(12) | 13.2(12) | -2.3(10) | 6.4(10)  | -2.0(10)  |
| C2   | 24.6(13) | 25.8(14) | 18.2(12) | -1.9(11) | 10.0(11) | -5.4(11)  |
| C3   | 22.0(13) | 31.4(15) | 18.5(13) | -5.8(11) | 8.7(11)  | -10.0(11) |
| C4   | 18.5(13) | 35.6(16) | 16.6(12) | -3.4(11) | 4.8(10)  | 0.9(12)   |
| C5   | 22.9(13) | 25.7(14) | 17.9(12) | 1.0(10)  | 9.1(10)  | 1.4(11)   |
| C6   | 19.4(12) | 22.6(13) | 12.7(11) | -3.0(10) | 7.1(10)  | -4.2(10)  |
| C7   | 19.7(12) | 21.2(13) | 14.5(11) | 1.5(10)  | 6.6(10)  | -1.0(10)  |
| C8   | 19.7(12) | 17.1(12) | 17.4(12) | 0.7(10)  | 4.6(10)  | -1.1(10)  |
| C9   | 23.7(14) | 29.0(15) | 20.5(13) | 7.3(11)  | 3.7(11)  | -4.6(11)  |
| C10  | 28.1(15) | 31.6(16) | 30.0(15) | 8.4(13)  | 3.1(12)  | -10.5(13) |
| C11  | 26.1(14) | 29.7(15) | 22.7(14) | 2.0(11)  | 0.6(11)  | -4.2(12)  |
| C12  | 26.0(14) | 26.2(14) | 18.1(13) | 3.8(11)  | 4.9(11)  | 0.6(11)   |
| C13  | 23.6(13) | 15.4(12) | 16.8(12) | -0.3(10) | 7.1(10)  | -1.7(10)  |
| C14  | 21.3(12) | 15.7(12) | 17.1(12) | 3.8(9)   | 6.9(10)  | 2.2(10)   |
| C15  | 26.1(14) | 18.1(14) | 19.2(14) | 1.2(9)   | 8.1(12)  | -0.3(10)  |
| C16  | 34.0(16) | 20.1(13) | 17.9(13) | 1.0(11)  | 9.6(11)  | 2.8(12)   |
| C17  | 28.8(14) | 21.9(13) | 22.9(13) | 8.1(11)  | 15.4(11) | 5.9(11)   |

| Atom | $U_{11}$ | $U_{22}$ | $U_{33}$ | $U_{23}$ | $U_{13}$ | $U_{12}$ |
|------|----------|----------|----------|----------|----------|----------|
| C18  | 22.8(14) | 21.6(14) | 28.1(15) | 7.5(10)  | 7.3(12)  | -0.8(10) |
| C19  | 24.8(14) | 20.0(13) | 18.6(13) | 1.9(10)  | 5.4(11)  | 0.6(11)  |

**Table 3:** Bond Lengths in Å for **2018ncs0303**.

| Atom | Atom | Length/Å  | Atom | Atom | Length/Å |
|------|------|-----------|------|------|----------|
| Au1  | Cl1  | 2.2802(6) | C3   | C4   | 1.400(4) |
| Au1  | Cl2  | 2.2718(6) | C4   | C5   | 1.387(4) |
| Au1  | Cl3  | 2.2902(6) | C5   | C6   | 1.388(4) |
| Au1  | N1   | 2.024(2)  | C7   | C8   | 1.474(4) |
| F1   | C17  | 1.358(3)  | C8   | C9   | 1.380(4) |
| N1   | C1   | 1.393(3)  | C9   | C10  | 1.388(4) |
| N1   | C7   | 1.337(3)  | C10  | C11  | 1.376(4) |
| N2   | C6   | 1.393(3)  | C11  | C12  | 1.383(4) |
| N2   | C7   | 1.355(3)  | C13  | C14  | 1.516(3) |
| N2   | C13  | 1.479(3)  | C14  | C15  | 1.395(4) |
| N3   | C8   | 1.347(3)  | C14  | C19  | 1.387(4) |
| N3   | C12  | 1.330(4)  | C15  | C16  | 1.387(4) |
| C1   | C2   | 1.388(4)  | C16  | C17  | 1.379(4) |
| C1   | C6   | 1.401(4)  | C17  | C18  | 1.369(4) |
| C2   | C3   | 1.383(4)  | C18  | C19  | 1.394(4) |

**Table 4:** Bond Angles in ° for **2018ncs0303**.

| Atom | Atom | Atom | Angle/°    | Atom | Atom | Atom | Angle/°  |
|------|------|------|------------|------|------|------|----------|
| Cl1  | Au1  | Cl3  | 176.75(2)  | C5   | C6   | C1   | 122.1(2) |
| Cl2  | Au1  | Cl1  | 89.13(2)   | N1   | C7   | N2   | 110.2(2) |
| Cl2  | Au1  | Cl3  | 91.36(2)   | N1   | C7   | C8   | 122.9(2) |
| N1   | Au1  | Cl1  | 89.39(6)   | N2   | C7   | C8   | 126.8(2) |
| N1   | Au1  | Cl2  | 178.43(6)  | N3   | C8   | C7   | 113.1(2) |
| N1   | Au1  | Cl3  | 90.09(6)   | N3   | C8   | C9   | 123.4(2) |
| C1   | N1   | Au1  | 126.63(18) | C9   | C8   | C7   | 123.5(2) |
| C7   | N1   | Au1  | 125.13(17) | C8   | C9   | C10  | 118.1(2) |
| C7   | N1   | C1   | 108.0(2)   | C11  | C10  | C9   | 119.3(3) |
| C6   | N2   | C13  | 123.6(2)   | C10  | C11  | C12  | 118.3(3) |
| C7   | N2   | C6   | 108.1(2)   | N3   | C12  | C11  | 123.8(3) |
| C7   | N2   | C13  | 128.2(2)   | C15  | C14  | C13  | 121.5(2) |
| C12  | N3   | C8   | 117.0(2)   | C19  | C14  | C13  | 119.3(2) |
| N1   | C1   | C6   | 107.3(2)   | C19  | C14  | C15  | 119.3(2) |
| C2   | C1   | N1   | 131.1(3)   | C16  | C15  | C14  | 120.4(3) |
| C2   | C1   | C6   | 121.6(2)   | C17  | C16  | C15  | 118.4(3) |
| C3   | C2   | C1   | 116.5(3)   | F1   | C17  | C16  | 117.9(2) |
| C2   | C3   | C4   | 121.8(2)   | C18  | C17  | C16  | 123.0(2) |
| C5   | C4   | C3   | 122.0(2)   | C17  | C18  | C19  | 118.0(3) |
| C4   | C5   | C6   | 116.0(3)   | C14  | C19  | C18  | 120.9(3) |
| N2   | C6   | C1   | 106.4(2)   |      |      |      |          |
| C5   | C6   | N2   | 131.6(2)   |      |      |      |          |

**Table 5:** Torsion Angles in ° for 2018ncs0303.

| Atom | Atom | Atom | Atom | Angle/°    |
|------|------|------|------|------------|
| Au1  | N1   | C1   | C2   | 3.6(4)     |
| Au1  | N1   | C1   | C6   | -          |
|      |      |      |      | 175.69(16) |
| Au1  | N1   | C7   | N2   | 174.79(16) |
| Au1  | N1   | C7   | C8   | -9.0(3)    |
| F1   | C17  | C18  | C19  | -179.6(2)  |
| N1   | C1   | C2   | C3   | -179.7(3)  |
| N1   | C1   | C6   | N2   | 1.3(3)     |
| N1   | C1   | C6   | C5   | -179.7(2)  |
| N1   | C7   | C8   | N3   | -32.8(3)   |
| N1   | C7   | C8   | C9   | 146.9(3)   |
| N2   | C7   | C8   | N3   | 142.7(3)   |
| N2   | C7   | C8   | C9   | -37.5(4)   |
| N2   | C13  | C14  | C15  | 44.0(3)    |
| N2   | C13  | C14  | C19  | -137.0(2)  |
| N3   | C8   | C9   | C10  | -3.4(4)    |
| C1   | N1   | C7   | N2   | -0.4(3)    |
| C1   | N1   | C7   | C8   | 175.8(2)   |
| C1   | C2   | C3   | C4   | -0.2(4)    |
| C2   | C1   | C6   | N2   | -178.0(2)  |
| C2   | C1   | C6   | C5   | 1.0(4)     |
| C2   | C3   | C4   | C5   | 0.4(4)     |
| C3   | C4   | C5   | C6   | 0.1(4)     |
| C4   | C5   | C6   | N2   | 178.0(2)   |
| C4   | C5   | C6   | C1   | -0.7(4)    |
| C6   | N2   | C7   | N1   | 1.3(3)     |
| C6   | N2   | C7   | C8   | -174.8(2)  |
| C6   | N2   | C13  | C14  | -90.7(3)   |
| C6   | C1   | C2   | C3   | -0.5(4)    |
| C7   | N1   | C1   | C2   | 178.7(3)   |
| C7   | N1   | C1   | C6   | -0.6(3)    |
| C7   | N2   | C6   | C1   | -1.6(3)    |
| C7   | N2   | C6   | C5   | 179.6(3)   |
| C7   | N2   | C13  | C14  | 93.4(3)    |
| C7   | C8   | C9   | C10  | 176.9(3)   |
| C8   | N3   | C12  | C11  | -0.1(4)    |
| C8   | C9   | C10  | C11  | 0.6(5)     |
| C9   | C10  | C11  | C12  | 2.1(5)     |
| C10  | C11  | C12  | N3   | -2.4(5)    |
| C12  | N3   | C8   | C7   | -177.2(2)  |
| C12  | N3   | C8   | C9   | 3.1(4)     |
| C13  | N2   | C6   | C1   | -178.2(2)  |
| C13  | N2   | C6   | C5   | 3.0(4)     |
| C13  | N2   | C7   | N1   | 177.7(2)   |
| C13  | N2   | C7   | C8   | 1.6(4)     |
| C13  | C14  | C15  | C16  | 178.6(2)   |
| C13  | C14  | C19  | C18  | -179.1(2)  |
| C14  | C15  | C16  | C17  | 0.4(4)     |
| C15  | C14  | C19  | C18  | -0.2(4)    |
| C15  | C16  | C17  | F1   | 179.1(2)   |
| C15  | C16  | C17  | C18  | 0.0(4)     |
| C16  | C17  | C18  | C19  | -0.5(4)    |
| C17  | C18  | C19  | C14  | 0.6(4)     |
| C19  | C14  | C15  | C16  | -0.3(4)    |

**Table 6:** Hydrogen Fractional Atomic Coordinates ( $\times 10^4$ ) and Equivalent Isotropic Displacement Parameters ( $\text{\AA}^2 \times 10^3$ ) for **2018ncs0303**.  $U_{eq}$  is defined as 1/3 of the trace of the orthogonalised  $U_{ij}$ .

| Atom | x     | y    | z    | $U_{eq}$ |
|------|-------|------|------|----------|
| H2   | 4941  | 1321 | 4327 | 27       |
| H3   | 3215  | 2012 | 3320 | 28       |
| H4   | 2917  | 4272 | 2884 | 29       |
| H5   | 4339  | 5953 | 3424 | 26       |
| H9   | 8959  | 6138 | 5098 | 30       |
| H10  | 10687 | 6593 | 6186 | 38       |
| H11  | 11047 | 5432 | 7445 | 34       |
| H12  | 9744  | 3777 | 7555 | 29       |
| H13A | 7170  | 7156 | 5056 | 22       |
| H13B | 5894  | 7250 | 4399 | 22       |
| H15  | 6189  | 5811 | 2972 | 25       |
| H16  | 6973  | 6414 | 1936 | 28       |
| H18  | 9102  | 9139 | 3489 | 29       |
| H19  | 8293  | 8555 | 4520 | 26       |

### Citations

CrysAlisPro Software System, Rigaku Oxford Diffraction, (2018).

O.V. Dolomanov and L.J. Bourhis and R.J. Gildea and J.A.K. Howard and H. Puschmann, Olex2: A complete structure solution, refinement and analysis program, *J. Appl. Cryst.*, (2009), **42**, 339-341.

Sheldrick, G.M., Crystal structure refinement with ShelXL, *Acta Cryst.*, (2015), **C27**, 3-8.

Sheldrick, G.M., ShelXT-Integrated space-group and crystal-structure determination, *Acta Cryst.*, (2015), **A71**, 3-8.

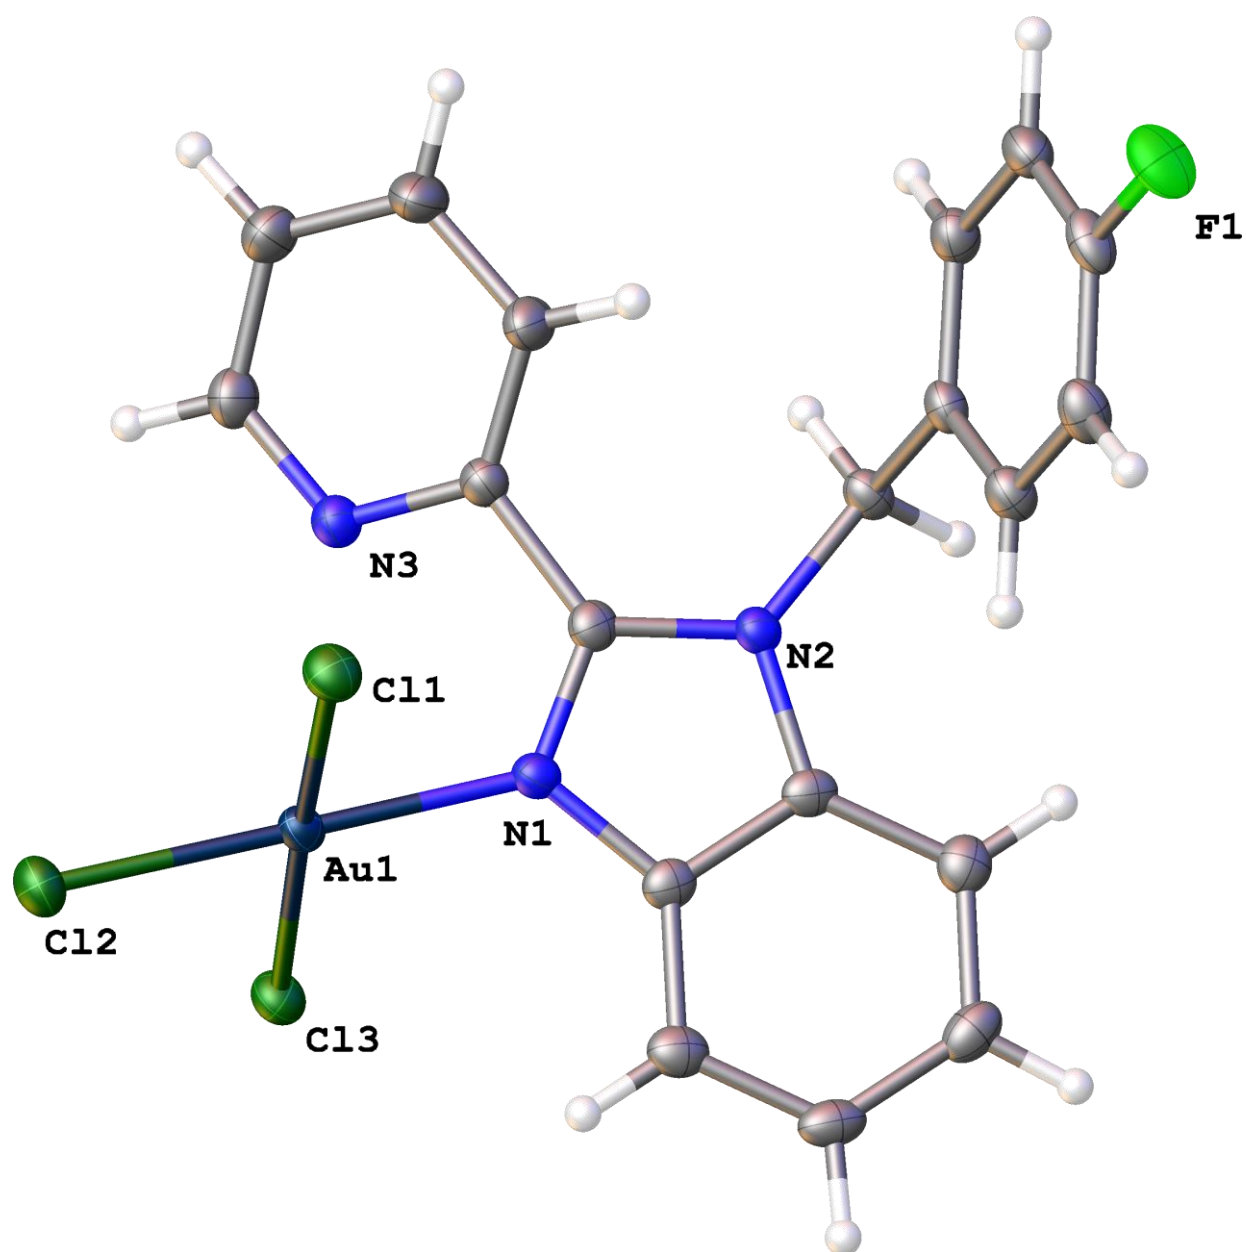

Supplement: s1 [file s1]
